# Supplementary material for: Peptide Diversification through Addition Reaction of Free Carboxylic Acids to Ynamides
Source: MDPI journal article supplement (doi:10.3390/pr11082262), 2023-07-27

# Supporting Information

## **Peptide diversification through addition reaction of free carboxylic acids to ynamides**

Zhefan Zhang,<sup>a</sup> Lingchao Cai,<sup>\*a</sup> and Liangliang Song<sup>\*a</sup>

<sup>a</sup>Jiangsu Provincial Key Lab for the Chemistry and Utilization of Agro-Forest Biomass, Jiangsu Co-Innovation Center of Efficient Processing and Utilization of Forest Resources, Jiangsu Key Lab of Biomass-Based Green Fuels and Chemicals, International Innovation Center for Forest Chemicals and Materials, College of Chemical Engineering, Nanjing Forestry University, Nanjing 210037, Jiangsu, China

## Table of Contents

|                                |     |
|--------------------------------|-----|
| 1. General Information .....   | S3  |
| 2. Substrate Preparation ..... | S4  |
| 3. Reference .....             | S9  |
| 4. Spectra.....                | S10 |

## 1. General Information

Ynamides **2a**<sup>[1]</sup>, **2b**<sup>[2]</sup>, **2d**<sup>[3]</sup>, **2e**<sup>[4]</sup> and **2i**<sup>[1]</sup> were all prepared according to previous reports. All other reagents were used as received from commercial sources. Reactions were monitored through thin-layer chromatography (TLC) on 0.25-mm silica gel plates and visualized under UV light. Flash column chromatography (FCC) was performed using Flash silica gel (90-Å pore size, 200-300 µm). NMR spectra were recorded on a Bruker Avance-400 or -600 instrument, calibrated to CD(H)Cl<sub>3</sub> as the internal reference (7.26 and 77.0 ppm for <sup>1</sup>H and <sup>13</sup>C NMR spectra, respectively) and CD(H)<sub>3</sub>OD(H) as the internal reference (3.31 and 49.0 ppm for <sup>1</sup>H and <sup>13</sup>C NMR spectra, respectively). <sup>1</sup>H NMR spectral data were reported in terms of chemical shift (δ, ppm), multiplicity, coupling constant (Hz), and integration. <sup>13</sup>C NMR spectral data were reported in terms of chemical shift (δ, ppm). The following abbreviations indicated the multiplicities: s, singlet; d, doublet; t, triplet; q, quartet; m, multiplet; and br, broad. High-resolution mass spectra were recorded using a SCIEX X500R LC-Q-TOF, ESI ion Source.

## 2. Substrate Preparation

Dipeptides were obtained using classical peptide synthesis in the liquid phase, by successive coupling and deprotection reactions.

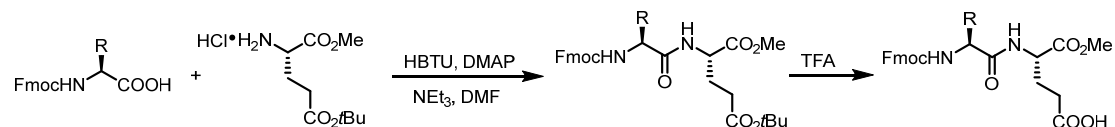

**General procedure for the formation of amide:** The amine (2.0 mmol) was dissolved in dried DMF (4.0 mL) in a flask equipped with a magnetic stirring bar. The carboxylic acid (2.2 mmol) and NEt<sub>3</sub> (4 mmol) were added and the mixture was cooled to 0 °C. Then HBTU (4.4 mmol) was added portion-wise and the mixture was stirred at room temperature. Then DMAP (0.4 mmol) was added and the reaction was stirred for 24 h. The reaction mixture was poured over 5% aqueous HCl (20 mL) under vigorous stirring. Extractions with ethyl acetate (3 × 20 mL) followed. The organic layers were combined, washed with saturated aqueous NaHCO<sub>3</sub> (3 × 20 mL) and brine (20 mL), and dried over anhydrous Na<sub>2</sub>SO<sub>4</sub>. The solvent was removed under reduced pressure, and the reaction crude was purified by silica gel column chromatography (Petroleum ether/EtOAc or Methanol/Dichloromethane) to afford the products.

**General procedure for the deprotection of *t*Bu group:** The dipeptide (1.0 mmol) was dissolved in TFA (1 mL) and the solution was stirred at room temperature, monitored by TLC. After the dipeptide was consumed completely, the solvent was removed under reduced pressure and the reaction crude was purified by silica gel column chromatography (Petroleum ether/EtOAc or Methanol/Dichloromethane) to afford the products.

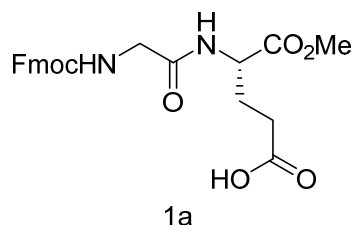

1a

396.1 mg, 45% (last step). Light yellow solid.  $R_f$  = 0.3 (Methanol/Dichloromethane, 1:10).

**<sup>1</sup>H NMR** (400 MHz, CD<sub>3</sub>OD)  $\delta$  7.79 (d,  $J$  = 7.6 Hz, 2H), 7.74 – 7.58 (m, 2H), 7.39 (t,  $J$  = 7.5 Hz, 2H), 7.31 (t,  $J$  = 7.5 Hz, 2H), 4.60 – 4.47 (m, 1H), 4.37 (d,  $J$  = 7.0 Hz, 2H), 4.23 (t,  $J$  = 7.0 Hz, 1H), 3.84 (s, 2H), 3.72 (s, 3H), 2.41 (t,  $J$  = 7.5 Hz, 2H), 2.25 – 2.21 (m, 1H), 2.04 – 1.90 (m, 1H).

**<sup>13</sup>C NMR** (101 MHz, CD<sub>3</sub>OD)  $\delta$  174.9, 172.1, 170.9, 157.6, 143.9, 141.2, 127.4, 126.8, 124.8, 119.5, 66.8, 51.7, 51.4, 46.9, 43.3, 29.7, 26.4.

**HRMS** (ESI,  $m/z$ ) calcd for C<sub>23</sub>H<sub>25</sub>N<sub>2</sub>O<sub>7</sub> [ $M + H$ ]<sup>+</sup>: 441.1657, found: 441.1658.

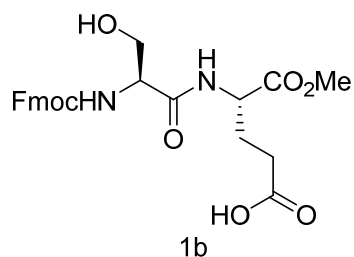

470.2 mg, 73% (last step). Light yellow solid.  $R_f$  = 0.3 (Methanol/Dichloromethane, 1:10).

**$^1\text{H}$  NMR** (400 MHz,  $\text{CD}_3\text{OD}$ )  $\delta$  7.81 (d,  $J$  = 7.6 Hz, 2H), 7.74 – 7.58 (m, 2H), 7.41 (t,  $J$  = 7.6 Hz, 2H), 7.33 (t,  $J$  = 7.6 Hz, 2H), 4.55 (t,  $J$  = 7.1 Hz, 1H), 4.41 (d,  $J$  = 6.9 Hz, 2H), 4.26 (d,  $J$  = 6.2 Hz, 2H), 3.80 (d,  $J$  = 5.3 Hz, 2H), 3.73 (s, 3H), 2.38 (d,  $J$  = 7.4 Hz, 2H), 2.26 – 2.13 (m, 1H), 2.09 – 1.88 (m, 1H).

**$^{13}\text{C}$  NMR** (101 MHz,  $\text{CD}_3\text{OD}$ )  $\delta$  172.2, 171.7, 157.1, 143.9, 143.8, 141.2, 127.4, 126.8, 124.8, 124.8, 119.5, 66.8, 61.8, 57.0, 51.9, 51.5, 47.0, 29.3, 26.7.

**HRMS** (ESI,  $m/z$ ) calcd for  $\text{C}_{24}\text{H}_{26}\text{N}_2\text{O}_8$   $[\text{M} + \text{H}]^+$ : 471.1762, found: 471.1757.

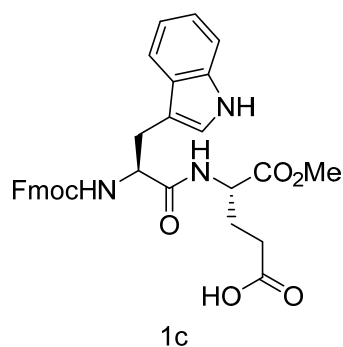

459.4 mg, 40% (last step). Light yellow solid.  $R_f$  = 0.3 (Methanol/Dichloromethane, 1:10).

**$^1\text{H}$  NMR** (600 MHz,  $\text{CD}_3\text{OD}$ )  $\delta$  7.76 (d,  $J$  = 7.6 Hz, 2H), 7.67 – 7.49 (m, 3H), 7.47 – 7.31 (m, 3H), 7.30 – 7.18 (m, 2H), 7.16 – 7.06 (m, 2H), 7.06 – 6.98 (m, 1H), 4.55 – 4.40 (m, 2H), 4.30 (dd,  $J$  = 10.6, 7.1 Hz, 1H), 4.23 (dd,  $J$  = 10.5, 6.8 Hz, 1H), 4.13 (t,  $J$  = 7.1 Hz, 1H), 3.64 (s, 3H), 3.28 (dd,  $J$  = 14.6, 6.0 Hz, 1H), 3.11 (dd,  $J$  = 14.6, 8.0 Hz, 1H), 2.39 – 2.20 (m, 2H), 2.17 – 2.03 (m, 1H), 1.96 – 1.83 (m, 1H).

**$^{13}\text{C}$  NMR** (101 MHz,  $\text{CD}_3\text{OD}$ )  $\delta$  173.3, 172.1, 156.8, 143.8, 143.7, 141.1, 136.6, 127.4, 126.8, 124.9, 124.8, 123.4, 121.0, 119.5, 118.5, 117.9, 110.9, 109.4, 66.7, 55.8, 51.9, 51.4, 46.9, 27.7, 26.6.

**HRMS** (ESI,  $m/z$ ) calcd for  $\text{C}_{32}\text{H}_{31}\text{N}_3\text{O}_7$   $[\text{M} + \text{H}]^+$ : 570.2235, found: 570.2219.

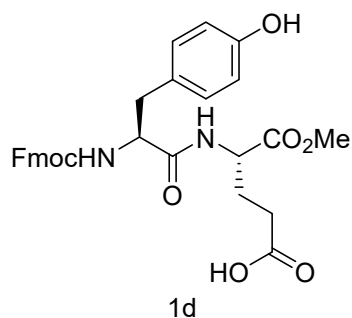

327.7 mg, 30% (last step). Light yellow solid.  $R_f = 0.4$  (Methanol/Dichloromethane, 1:10).

**$^1\text{H}$  NMR** (400 MHz,  $\text{CD}_3\text{OD}$ )  $\delta$  7.79 (d,  $J = 7.6$  Hz, 1H), 7.72 (d,  $J = 7.6$  Hz, 1H), 7.68 – 7.50 (m, 2H), 7.48 – 7.36 (m, 2H), 7.35 – 7.22 (m, 2H), 7.08 (t,  $J = 6.7$  Hz, 2H), 6.72 (d,  $J = 7.9$  Hz, 2H), 4.61 – 4.43 (m, 2H), 4.40 – 4.13 (m, 3H), 3.70 (s, 3H), 3.08 – 2.96 (m, 1H), 2.87 – 2.74 (m, 1H), 2.37 (q,  $J = 7.6$  Hz, 2H), 2.25 – 2.07 (m, 1H), 2.01 – 1.86 (m, 1H).

**$^{13}\text{C}$  NMR** (101 MHz,  $\text{CD}_3\text{OD}$ )  $\delta$  173.0, 172.0, 156.8, 155.8, 143.9, 143.8, 141.1, 140.7, 130.0, 129.5, 127.7, 127.4, 126.8, 125.7, 124.9, 124.8, 119.6, 119.5, 114.8, 66.6, 64.8, 56.5, 51.8, 51.4, 36.9, 30.1, 26.6.

**HRMS** (ESI,  $m/z$ ) calcd for  $\text{C}_{30}\text{H}_{30}\text{N}_2\text{O}_8$   $[\text{M} + \text{H}]^+$ : 547.2075, found: 547.2062.

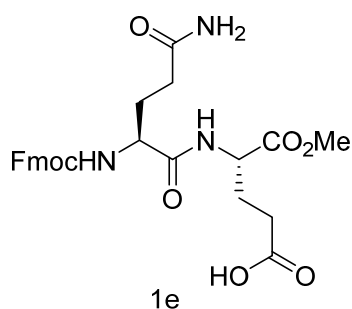

541.9 mg, 53% (last step). Light yellow solid.  $R_f = 0.3$  (Methanol/Dichloromethane, 1:10).

**$^1\text{H}$  NMR** (400 MHz,  $\text{CD}_3\text{OD}$ )  $\delta$  7.81 (d,  $J = 7.6$  Hz, 2H), 7.68 (t,  $J = 7.9$  Hz, 2H), 7.40 (t,  $J = 7.6$  Hz, 2H), 7.33 (t,  $J = 7.6$  Hz, 2H), 4.53 – 4.45 (m, 1H), 4.44 – 4.33 (m, 2H), 4.29 – 4.12 (m, 2H), 3.73 (s, 3H), 2.43 (t,  $J = 7.6$  Hz, 2H), 2.35 (t,  $J = 7.7$  Hz, 2H), 2.26 – 2.03 (m, 2H), 2.03 – 1.86 (m, 2H).

**$^{13}\text{C}$  NMR** (101 MHz,  $\text{CD}_3\text{OD}$ )  $\delta$  178.9, 175.5, 174.6, 159.4, 146.4, 146.2, 143.6, 129.8, 129.2, 127.3, 127.2, 121.9, 69.0, 56.8, 54.2, 53.8, 33.4, 32.2, 30.1, 28.6.

**HRMS** (ESI,  $m/z$ ) calcd for  $\text{C}_{26}\text{H}_{29}\text{N}_3\text{O}_8$   $[\text{M} + \text{H}]^+$ : 512.2028, found: 512.2019.

The ynamides compounds **2a-2i**<sup>[1]</sup> were prepared using reported methods.

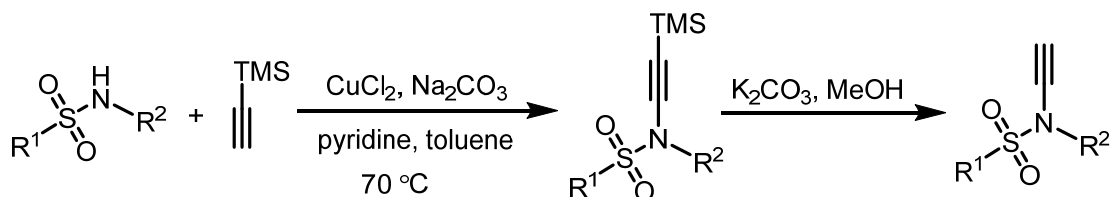

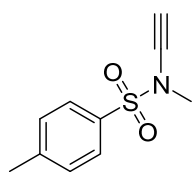

2a

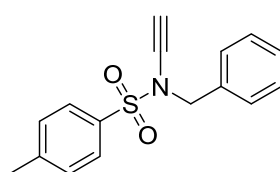

2b

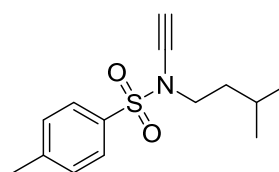

2c

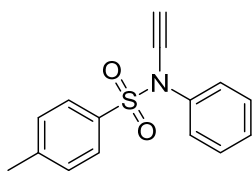

2d

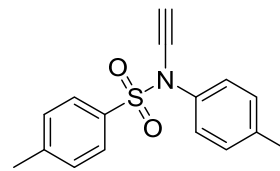

2e

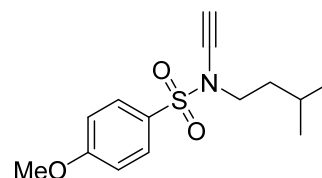

2f

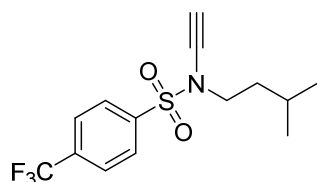

2g

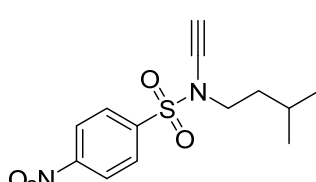

2h

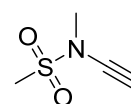

2i

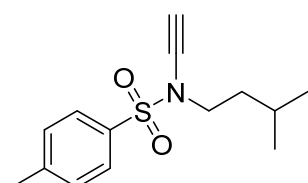

2c

253.2 mg, 63% (last step). Yellow oil.  $R_f = 0.5$  (Petroleum ether/EtOAc, 8:1).

$^1\text{H NMR}$  (400 MHz,  $\text{CDCl}_3$ )  $\delta$  7.81 (d,  $J = 8.1$  Hz, 2H), 7.37 (d,  $J = 8.0$  Hz, 2H), 3.32 (t,  $J = 7.5$  Hz, 2H), 2.74 (s, 1H), 2.46 (s, 3H), 1.67 – 1.61 (m, 1H), 1.53 (q,  $J = 7.1$  Hz, 2H), 0.90 (d,  $J = 6.5$  Hz, 6H).

$^{13}\text{C NMR}$  (101 MHz,  $\text{CDCl}_3$ )  $\delta$  144.7, 134.4, 129.7, 127.6, 76.0, 59.0, 49.5, 36.2, 25.1, 22.2, 21.6.

**HRMS** (ESI,  $m/z$ ) calcd for  $\text{C}_{14}\text{H}_{20}\text{NO}_2\text{S}$   $[\text{M} + \text{H}]^+$ : 266.1209, found: 266.1210.

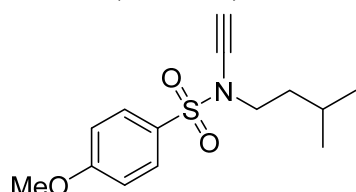

2f

365.4 mg, 26% (last step). Yellow oil.  $R_f = 0.6$  (Petroleum ether/EtOAc, 10:1).

$^1\text{H NMR}$  (400 MHz,  $\text{CDCl}_3$ )  $\delta$  7.87 (d,  $J = 7.6$  Hz, 2H), 7.03 (d,  $J = 7.7$  Hz, 2H), 3.91 (s, 3H), 3.33 (t,  $J = 7.0$  Hz, 2H), 2.75 (s, 1H), 1.66 (d,  $J = 15.4$  Hz, 1H), 1.54 (q,  $J = 6.6$

Hz, 2H), 0.91 (d,  $J = 5.7$  Hz, 6H).

**$^{13}\text{C}$  NMR** (151 MHz,  $\text{CDCl}_3$ )  $\delta$  163.7, 129.8, 129.2, 114.3, 76.3, 59.0, 55.7, 49.5, 36.4, 25.3, 22.3.

**HRMS** (ESI,  $m/z$ ) calcd for  $\text{C}_{14}\text{H}_{20}\text{NO}_3\text{S}$   $[\text{M} + \text{H}]^+$ : 282.1159, found: 282.1162.

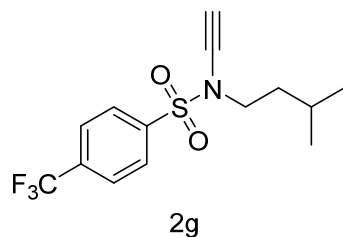

1244.5 mg, 78% (last step). Brown solid.  $R_f = 0.6$  (Petroleum ether/EtOAc, 15:1).

**$^1\text{H}$  NMR** (600 MHz,  $\text{CDCl}_3$ )  $\delta$  8.08 (d,  $J = 8.1$  Hz, 2H), 7.86 (d,  $J = 8.2$  Hz, 2H), 3.39 (t,  $J = 7.4$  Hz, 2H), 2.78 (s, 1H), 1.69 – 1.64 (m, 1H), 1.57 (d,  $J = 7.3$  Hz, 2H), 0.93 (d,  $J = 6.6$  Hz, 6H).

**$^{13}\text{C}$  NMR** (101 MHz,  $\text{CDCl}_3$ )  $\delta$  140.8, 135.3 (q,  $J = 33.2$  Hz), 128.1, 126.4 (q,  $J = 3.8$  Hz), 123.1 (q,  $J = 273.1$  Hz), 75.2, 59.6, 49.9, 36.4, 25.2, 22.2.

**HRMS** (ESI,  $m/z$ ) calcd for  $\text{C}_{14}\text{H}_{17}\text{F}_3\text{NO}_2\text{S}$   $[\text{M} + \text{H}]^+$ : 320.0927, found: 320.0928.

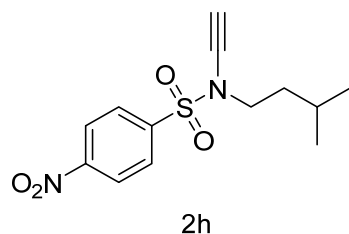

1465.6 mg, 99% (last step). Yellow solid.  $R_f = 0.6$  (Petroleum ether/EtOAc, 15:1).

**$^1\text{H}$  NMR** (400 MHz,  $\text{CDCl}_3$ )  $\delta$  8.44 (d,  $J = 8.9$  Hz, 2H), 8.13 (d,  $J = 8.8$  Hz, 2H), 3.44 – 3.36 (m, 2H), 2.79 (s, 1H), 1.7 – 1.62 (m, 1H), 1.56 (t,  $J = 7.1$  Hz, 2H), 0.93 (d,  $J = 6.5$  Hz, 6H).

**$^{13}\text{C}$  NMR** (101 MHz,  $\text{CDCl}_3$ )  $\delta$  150.6, 142.7, 128.8, 124.4, 74.8, 59.9, 50.1, 36.3, 25.1, 22.2.

**HRMS** (ESI,  $m/z$ ) calcd for  $\text{C}_{13}\text{H}_{17}\text{N}_2\text{O}_4\text{S}$   $[\text{M} + \text{H}]^+$ : 297.0904, found: 297.0910.

### 3. Reference

- [1] L. Hu, S. Xu, Z. Zhao, Y. Yang, Z. Peng, M. Yang, C. Wang, J. Zhao, *J Am Chem Soc* **2016**, *138*, 13135–13138.
- [2] Y. Zheng, B. Moegle, S. Ghosh, A. Perfetto, D. Luise, I. Ciofini, L. Miesch, *Chemistry - A European Journal* **2022**, *28*, DOI 10.1002/chem.202103598.
- [3] F. Schlimpen, T. Ast, V. Bénétteau, P. Pale, S. Chassaing, *Green Chemistry* **2022**, *24*, 6467–6475.
- [4] M. Yudasaka, D. Shimbo, T. Maruyama, N. Tada, A. Itoh, *Org Lett* **2019**, *21*, 1098–1102.

## 4. Spectra

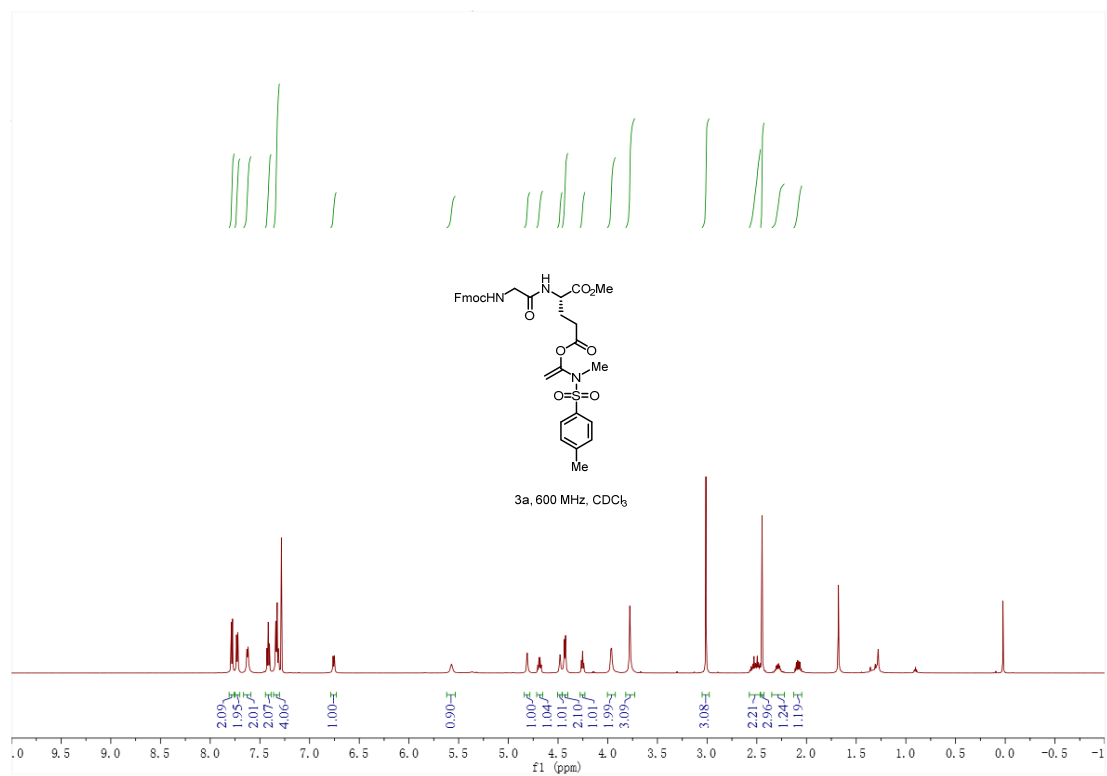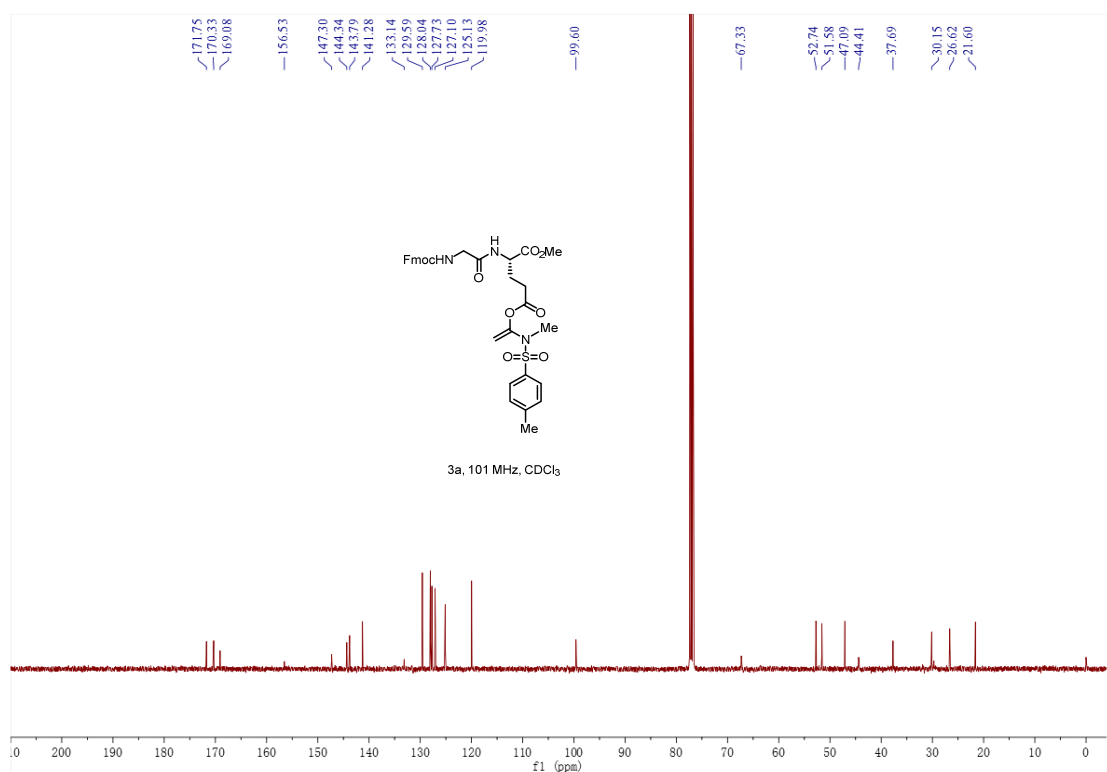

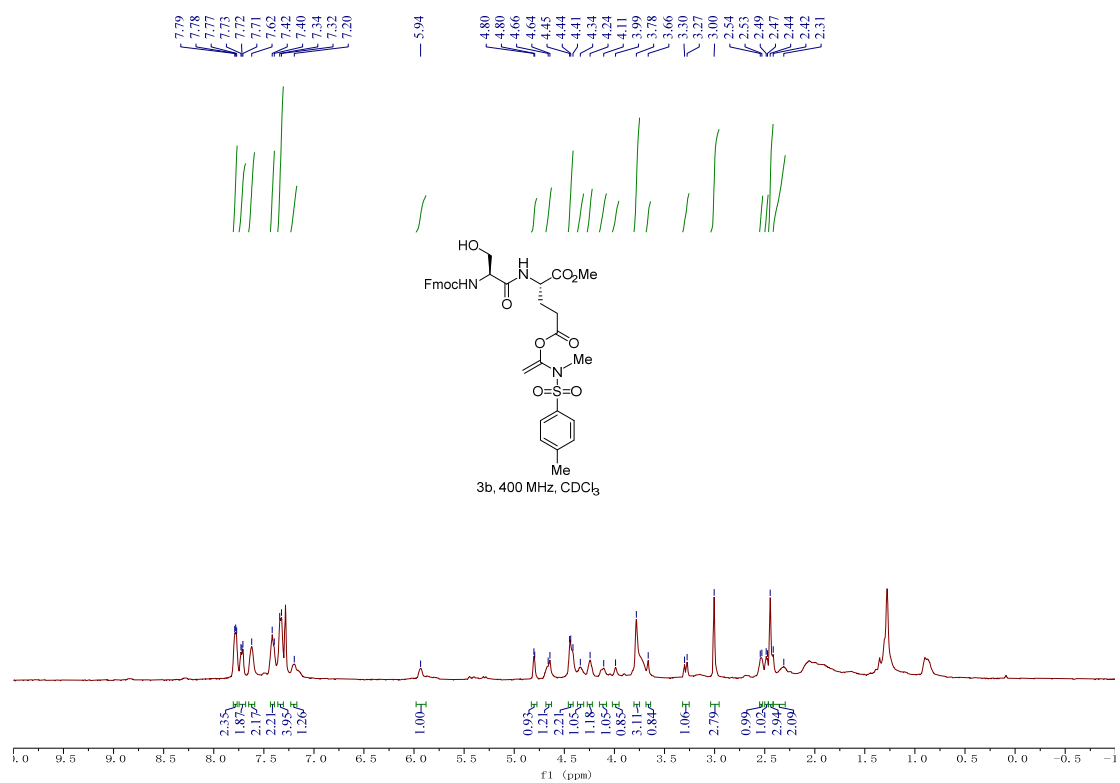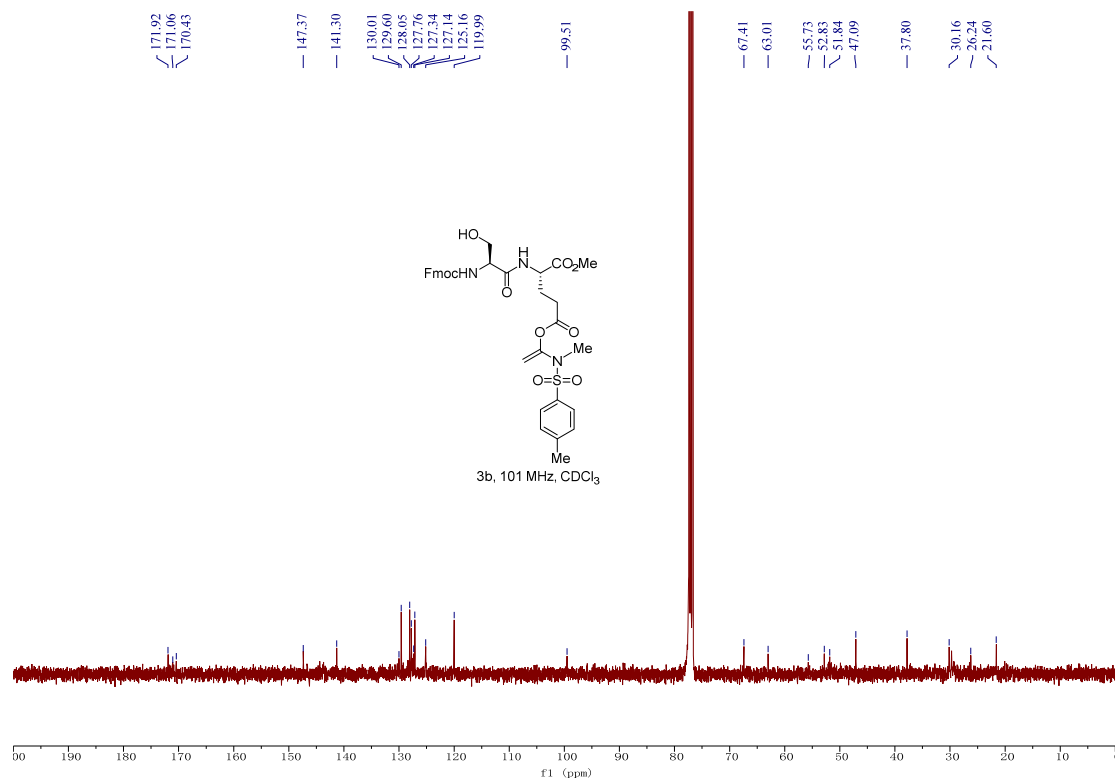

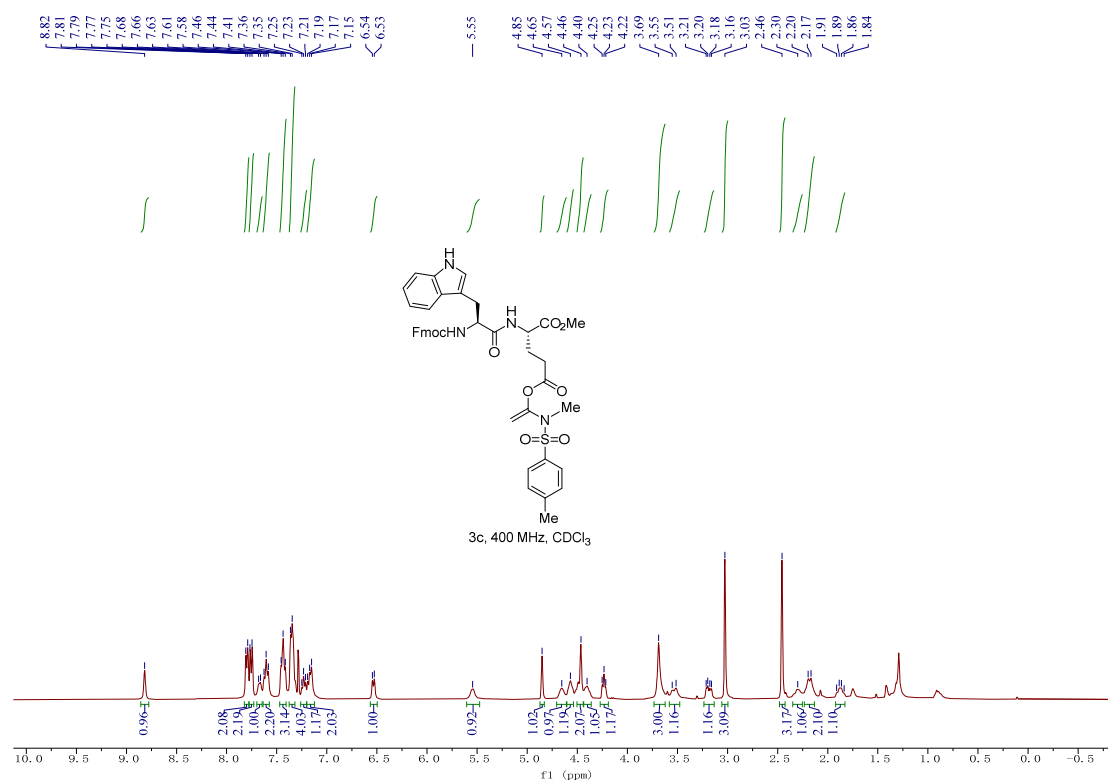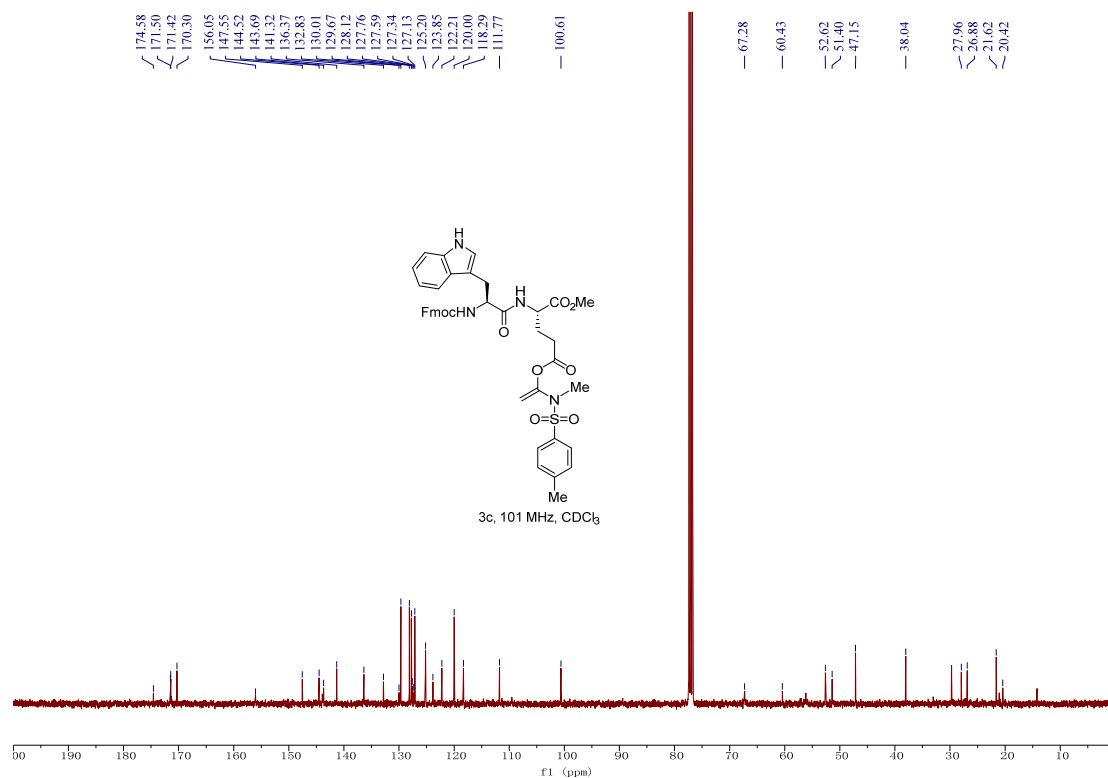

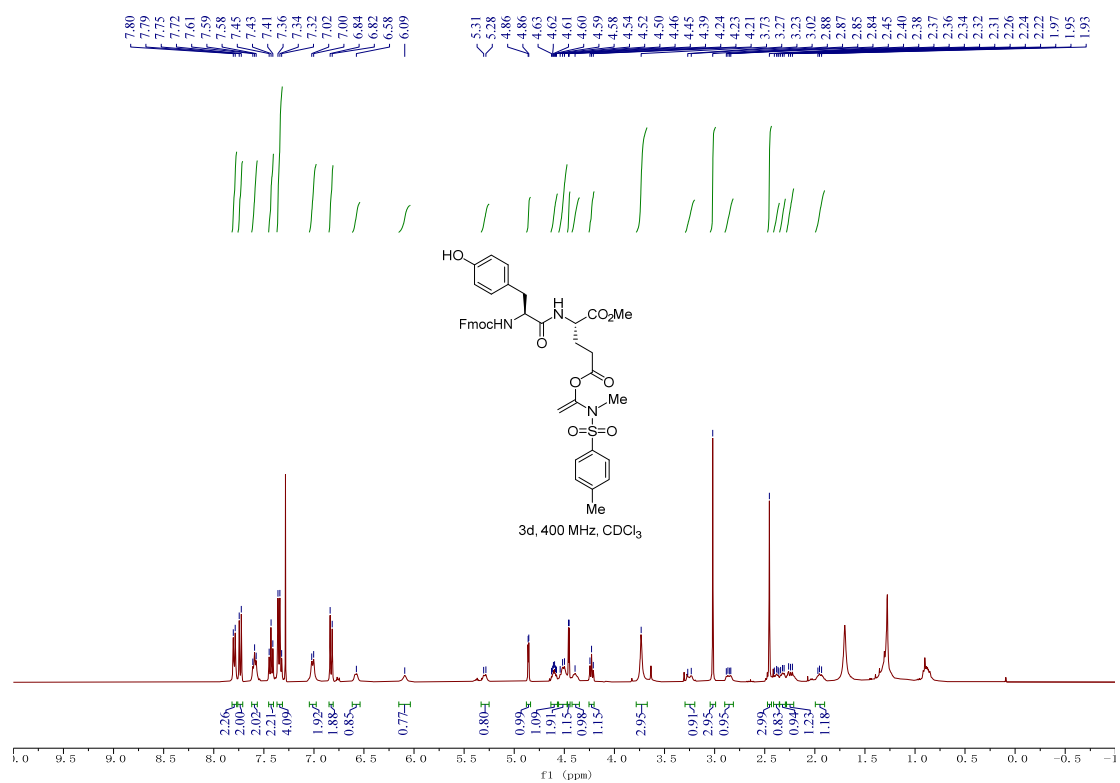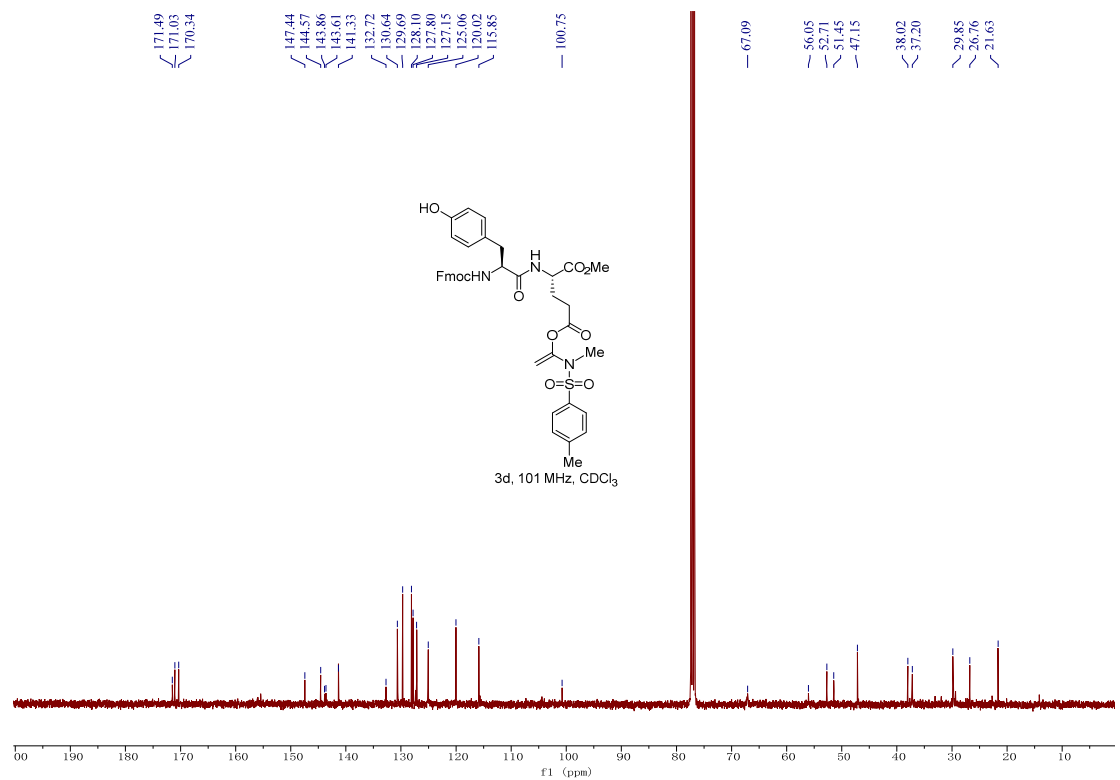

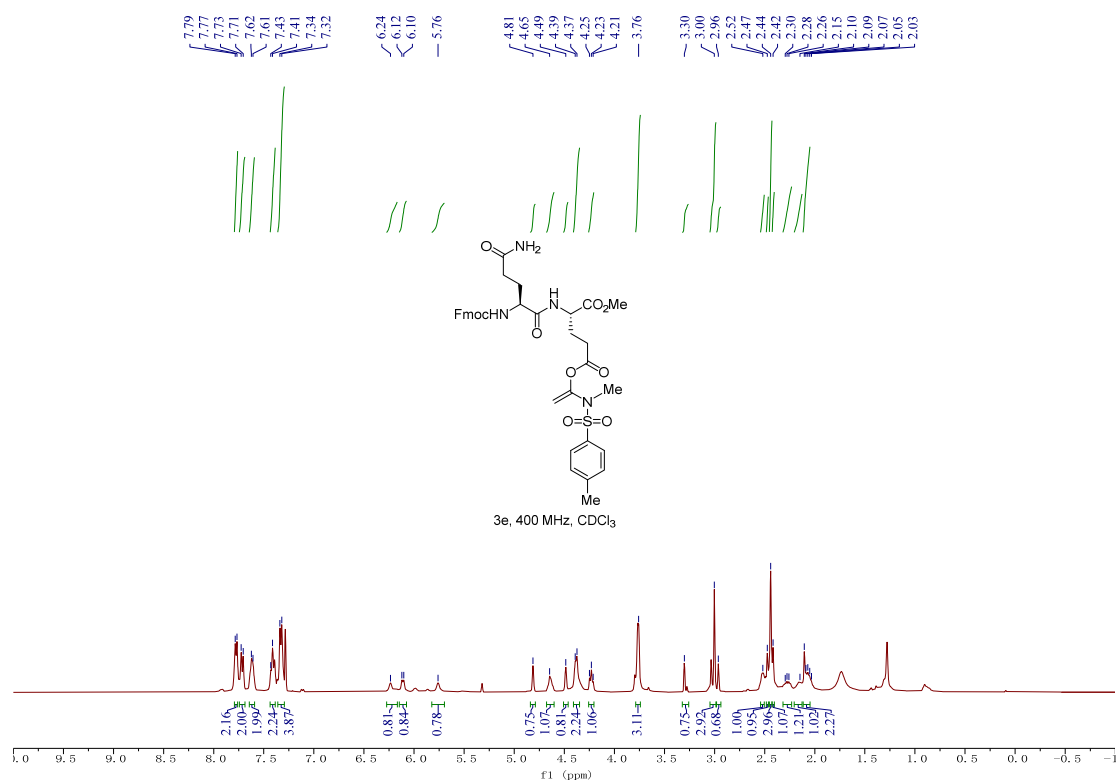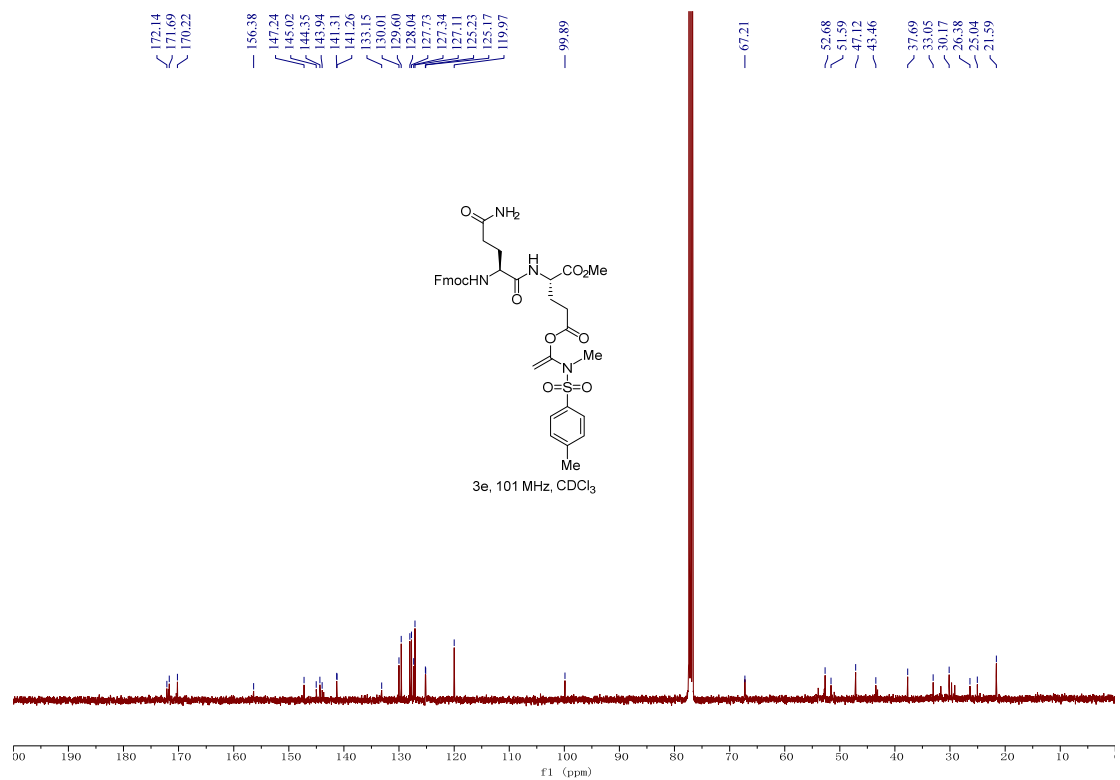

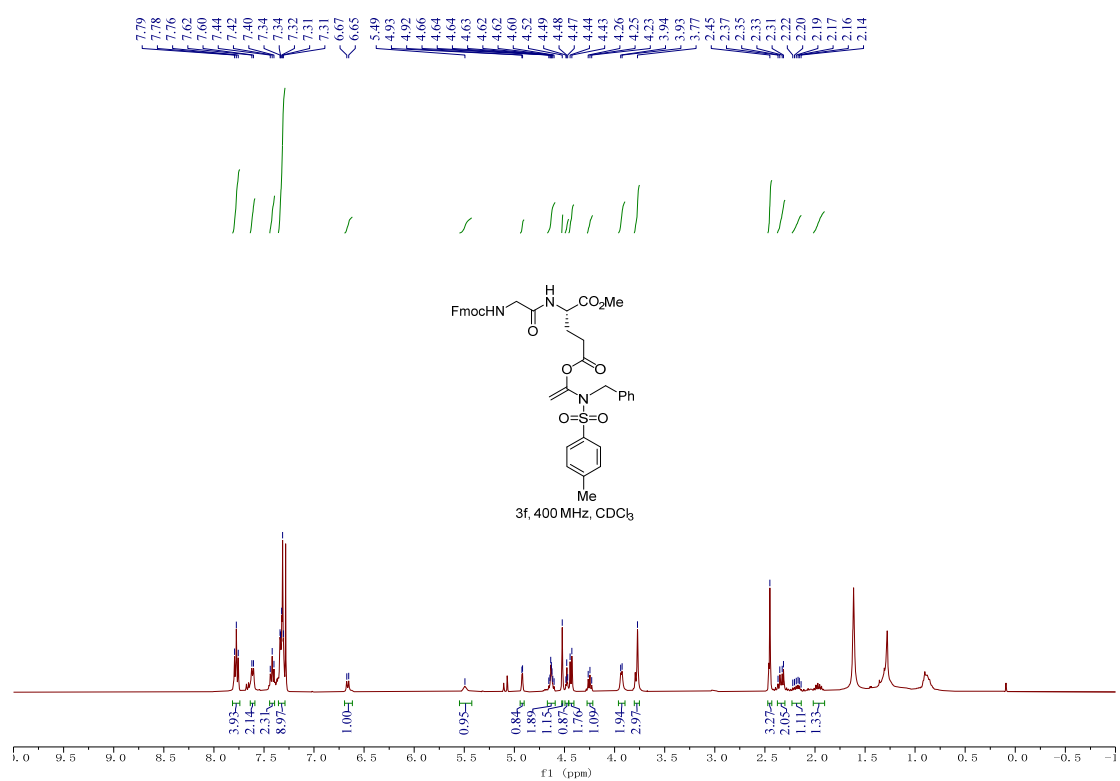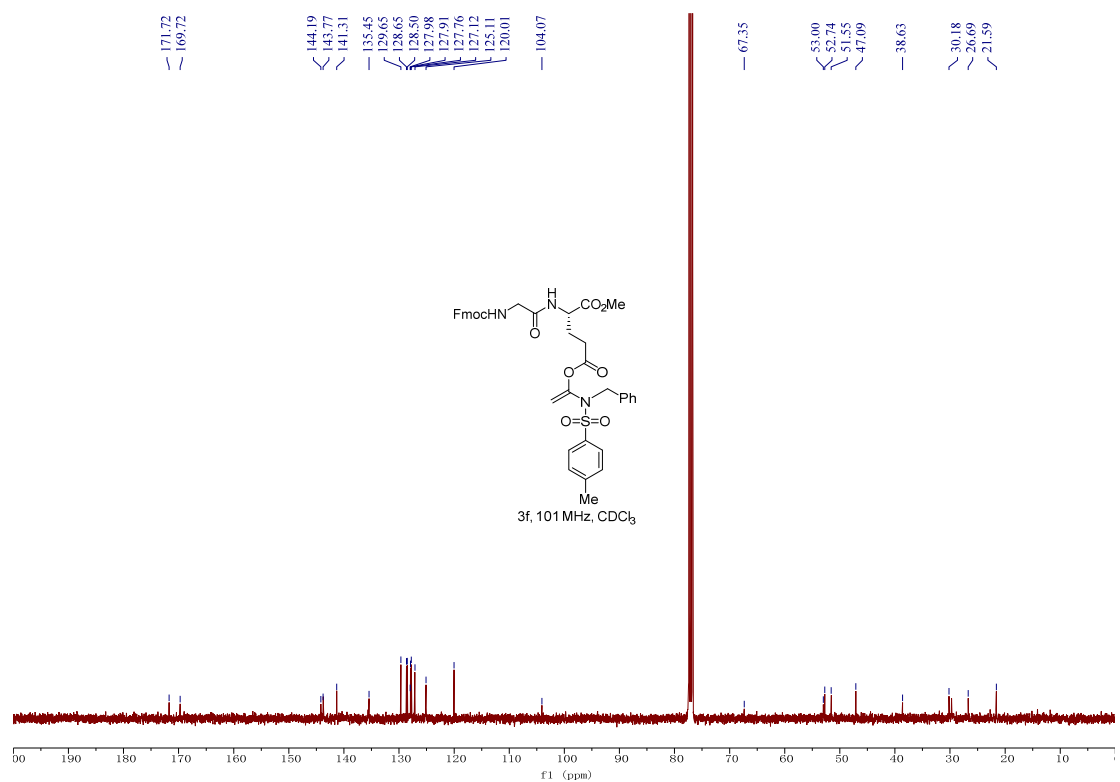

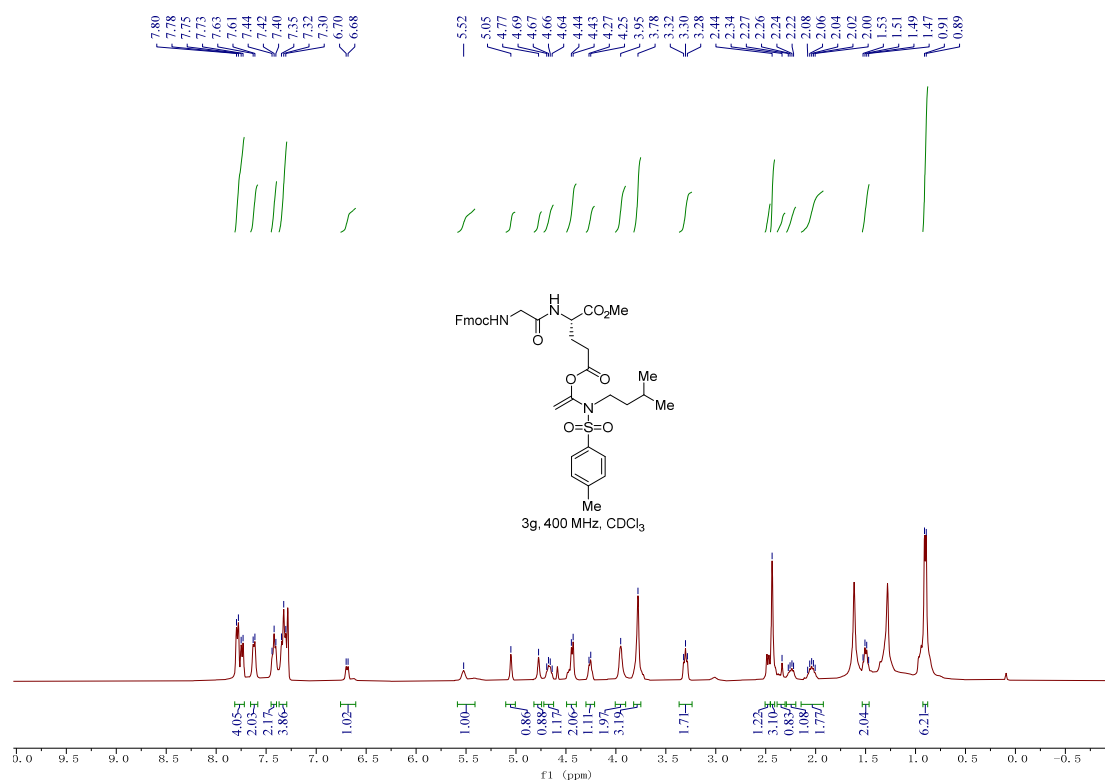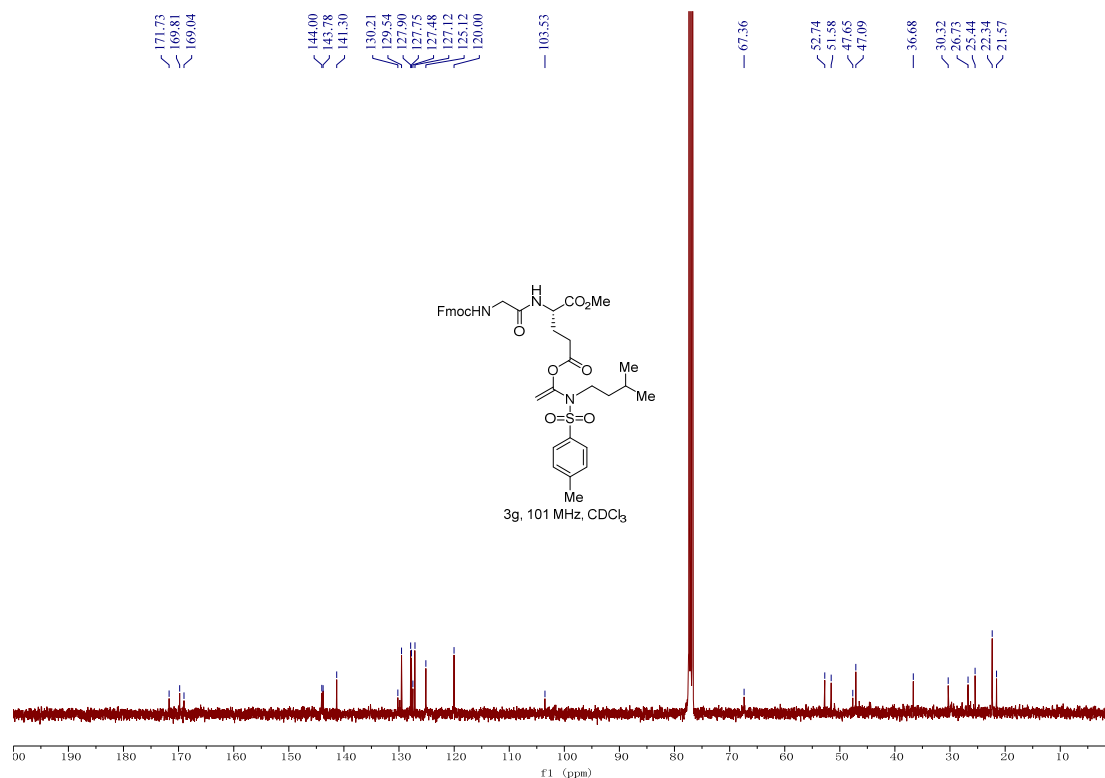

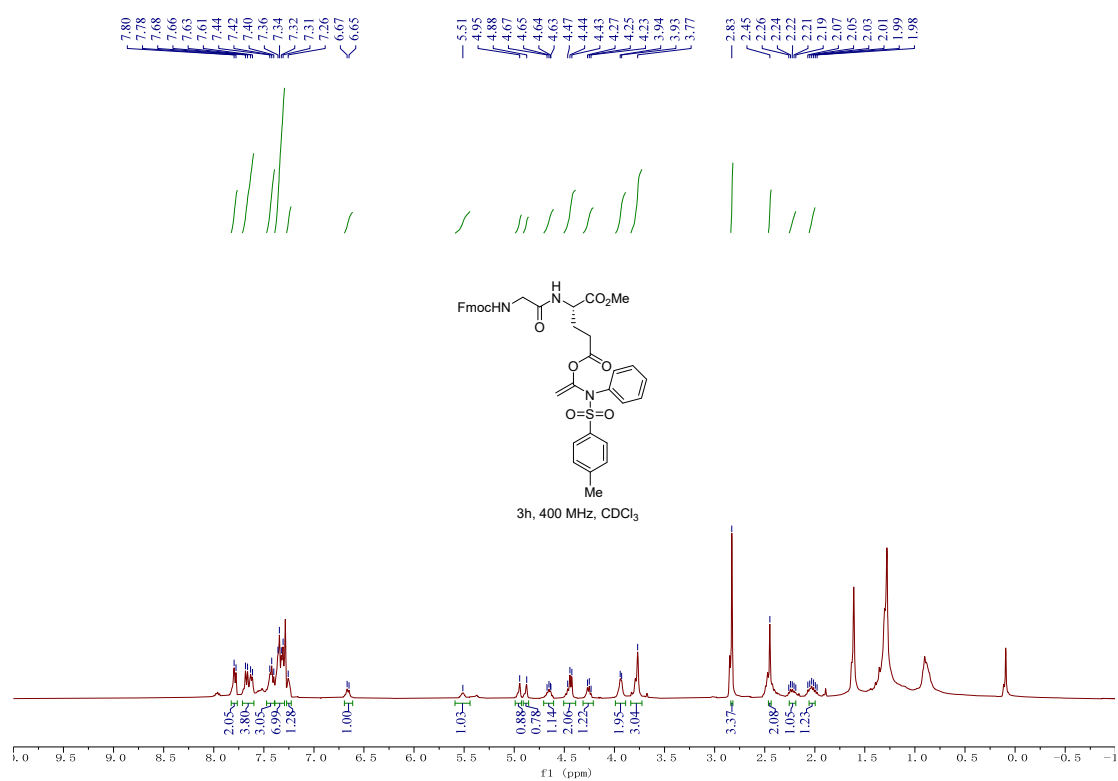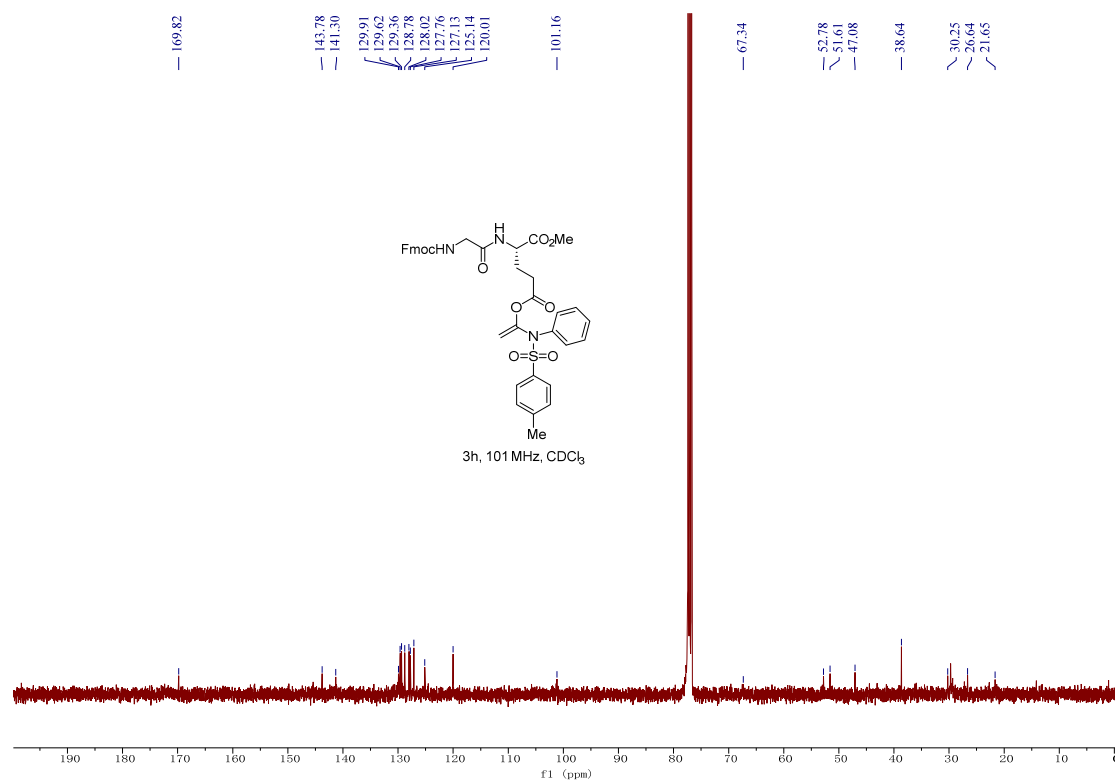

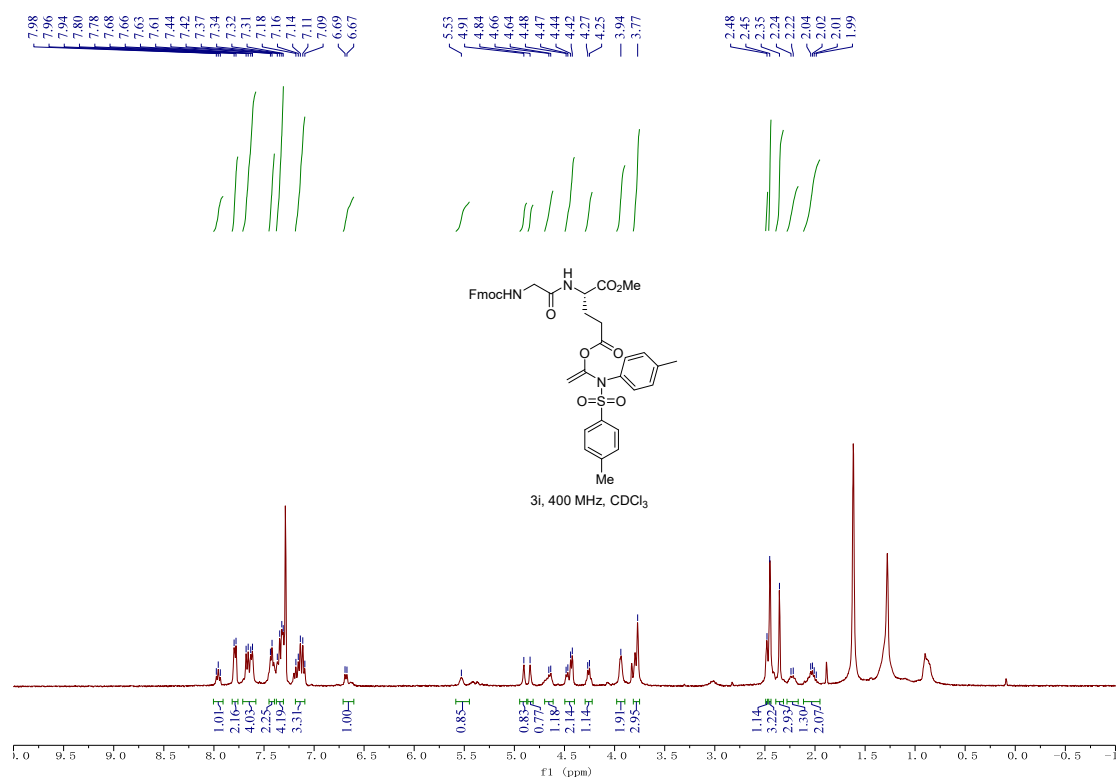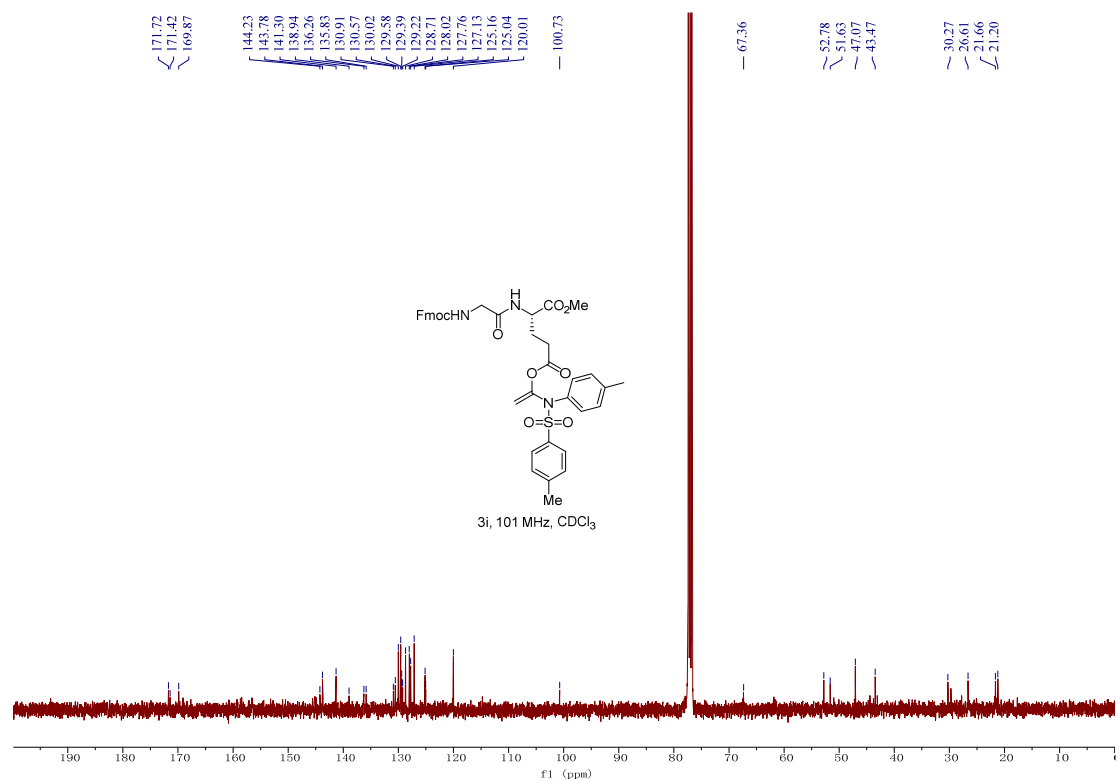

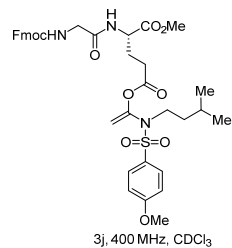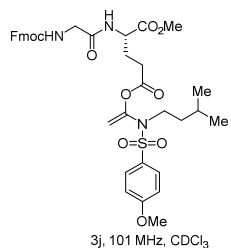

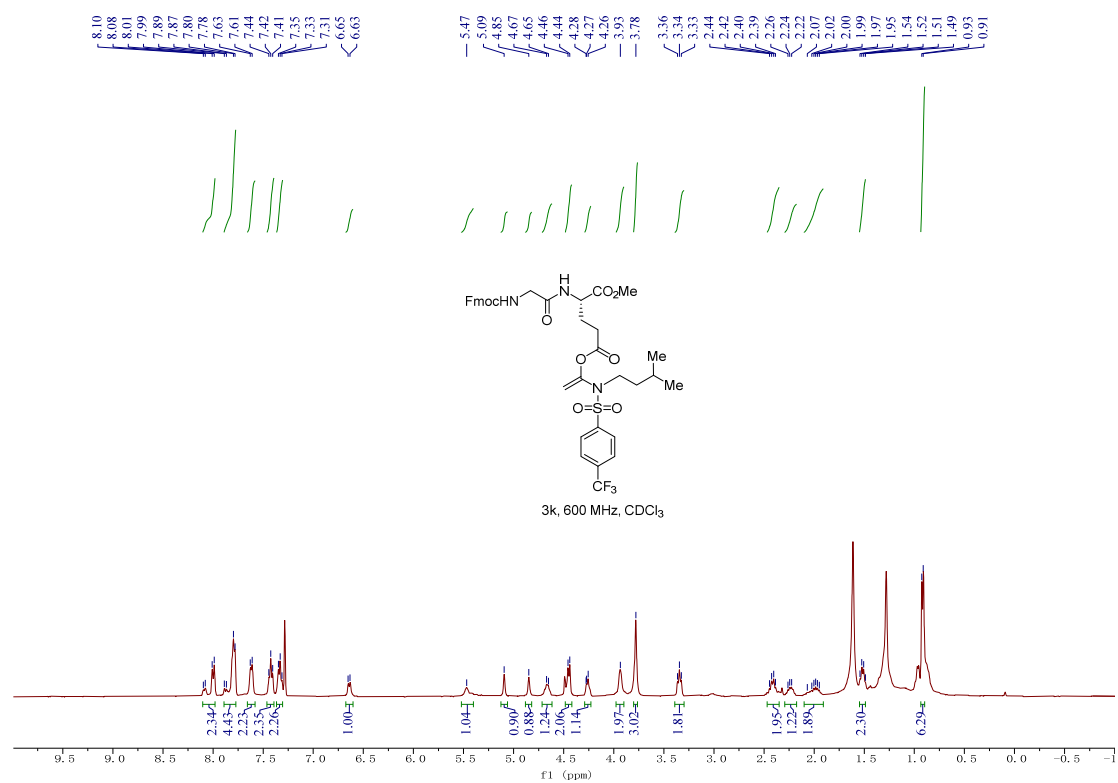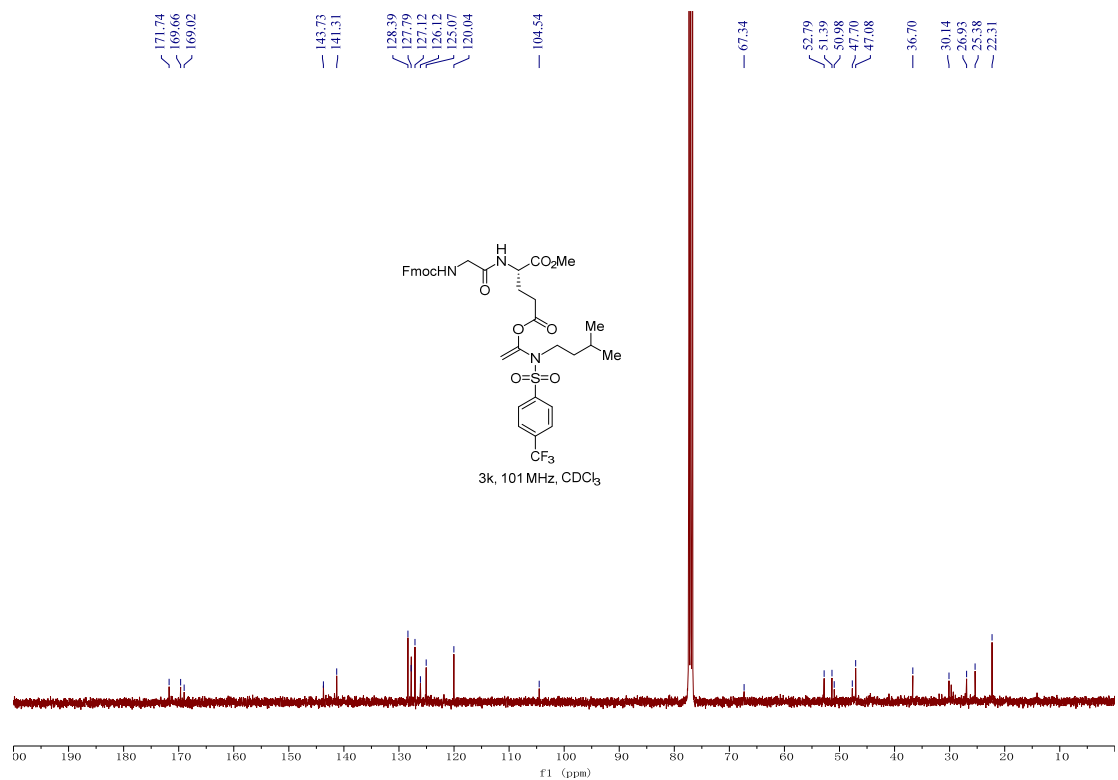

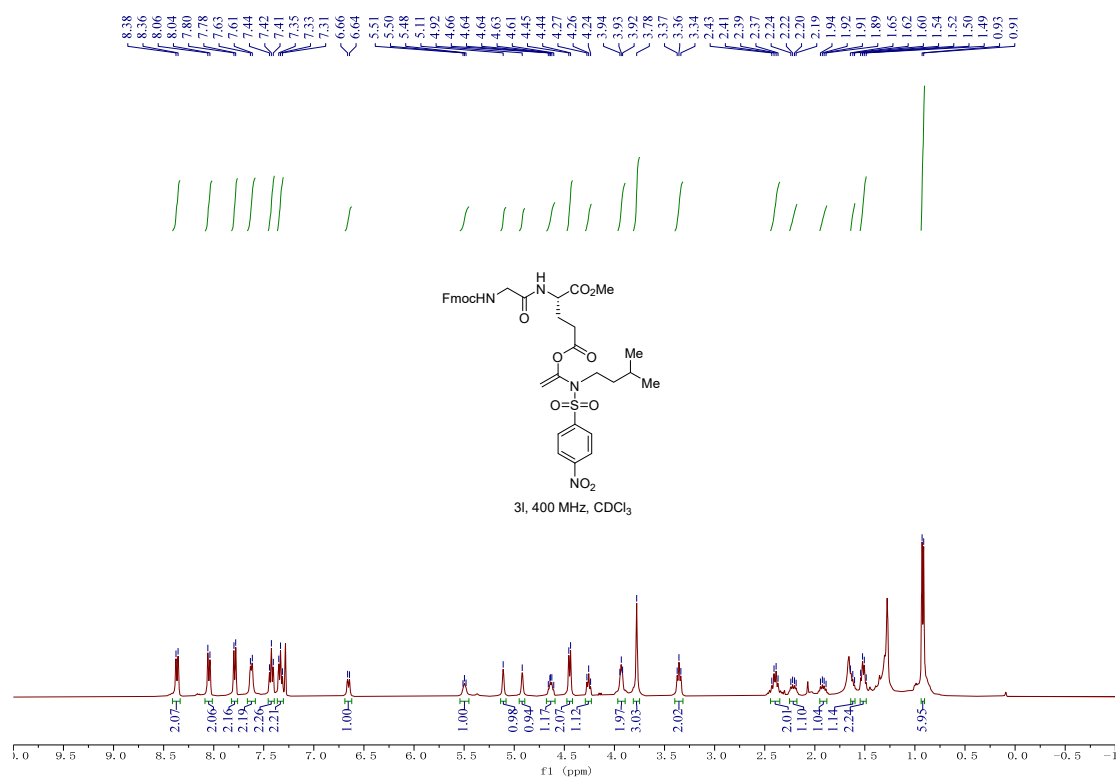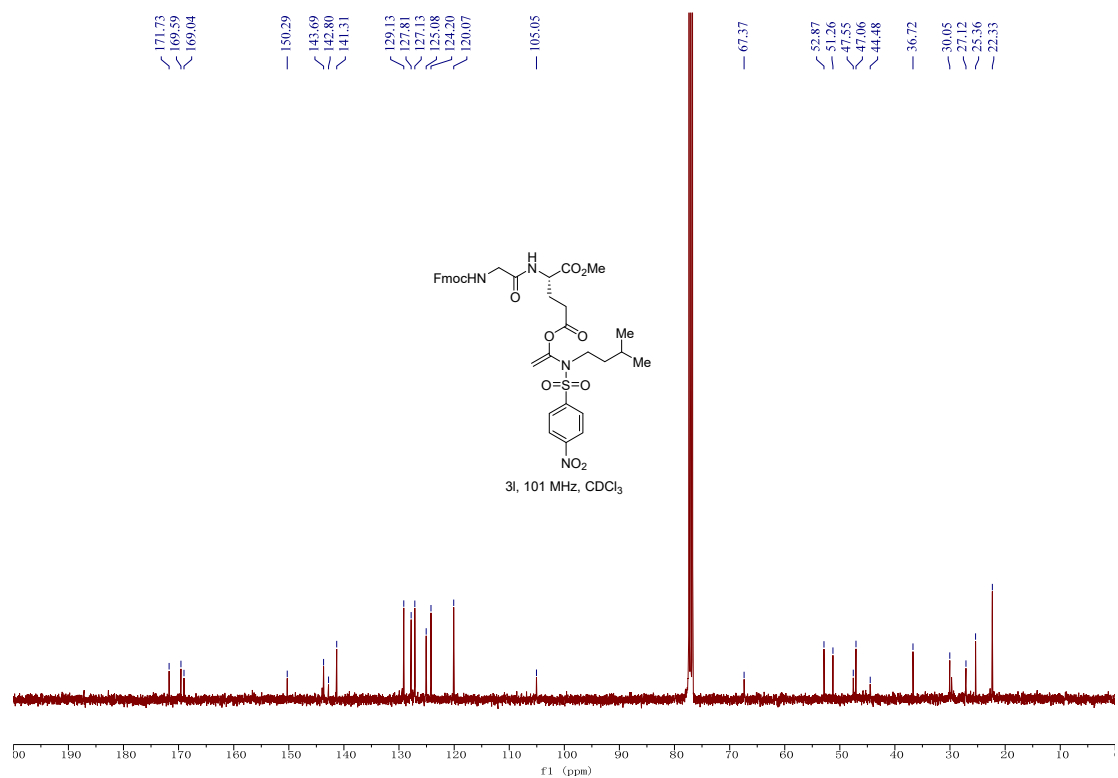

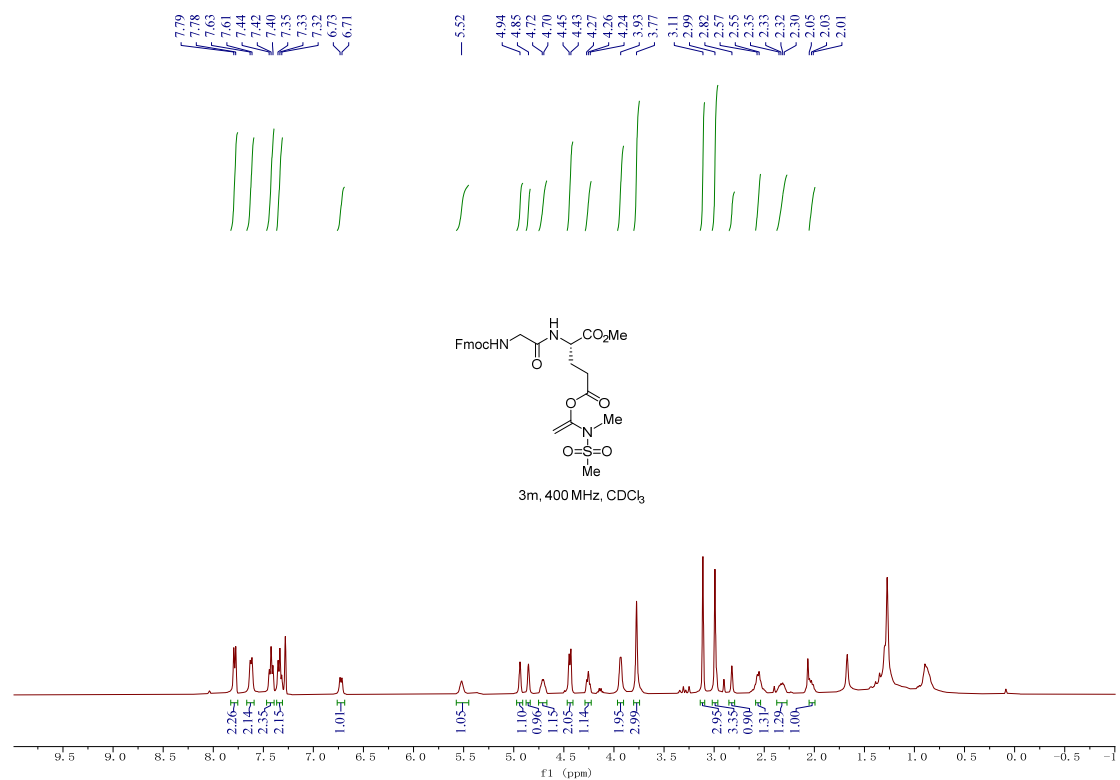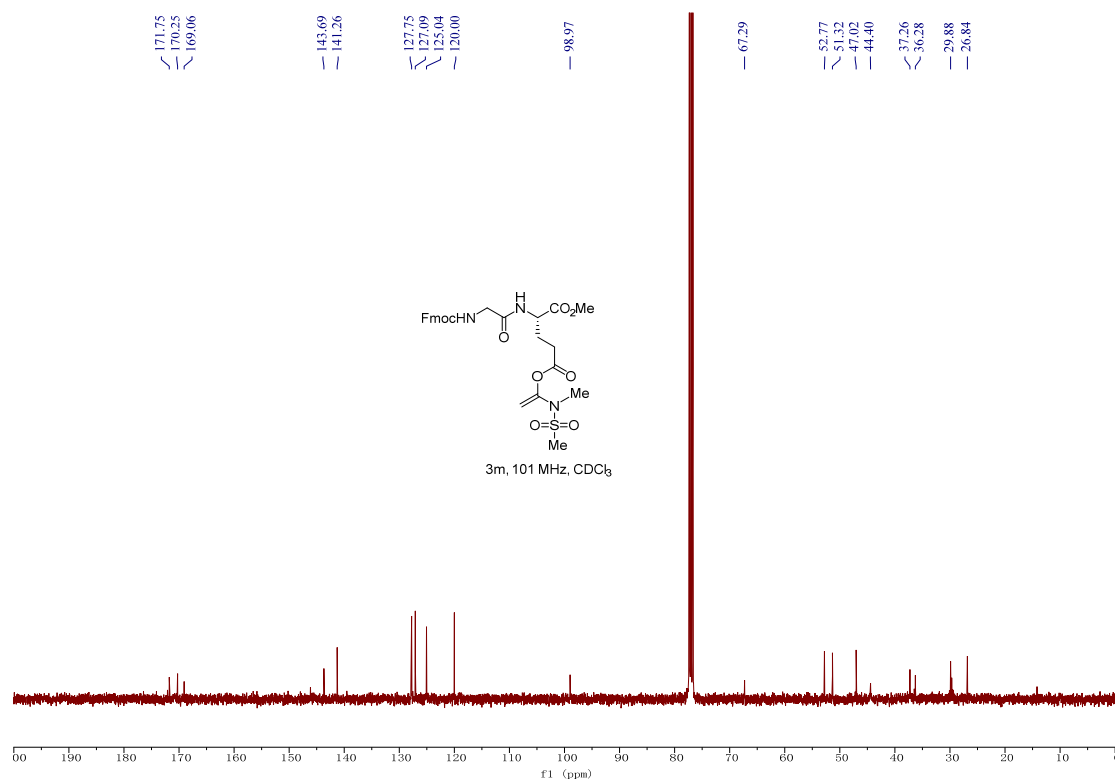

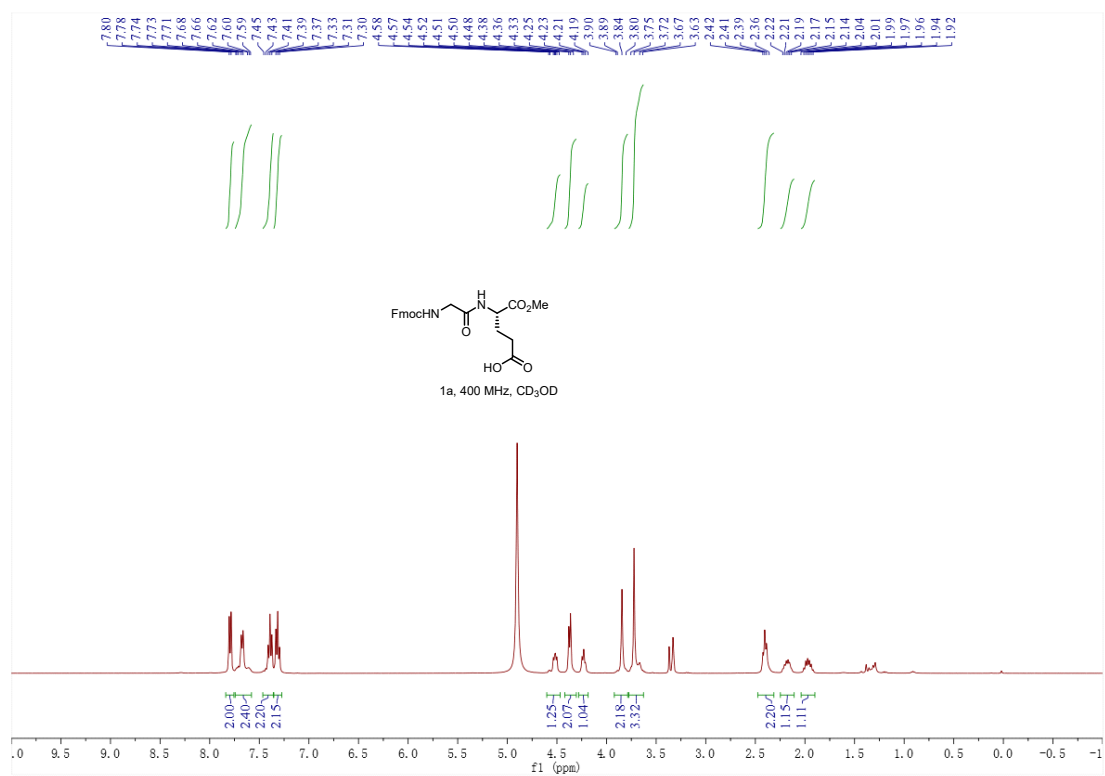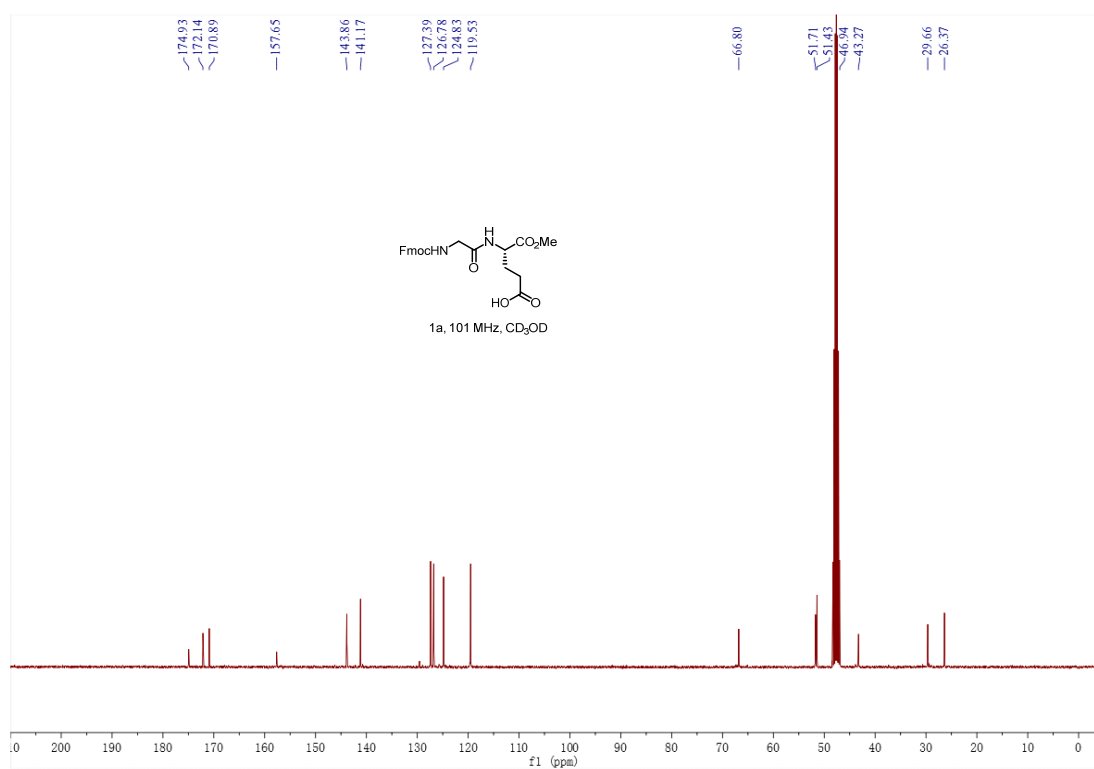

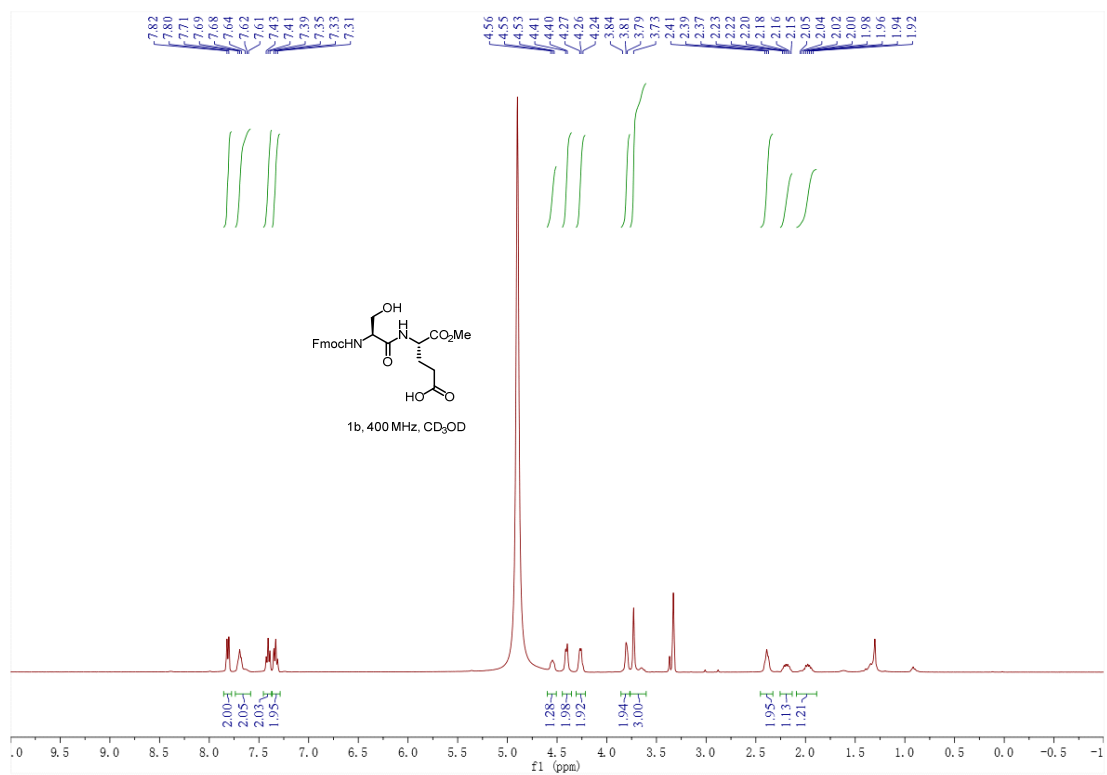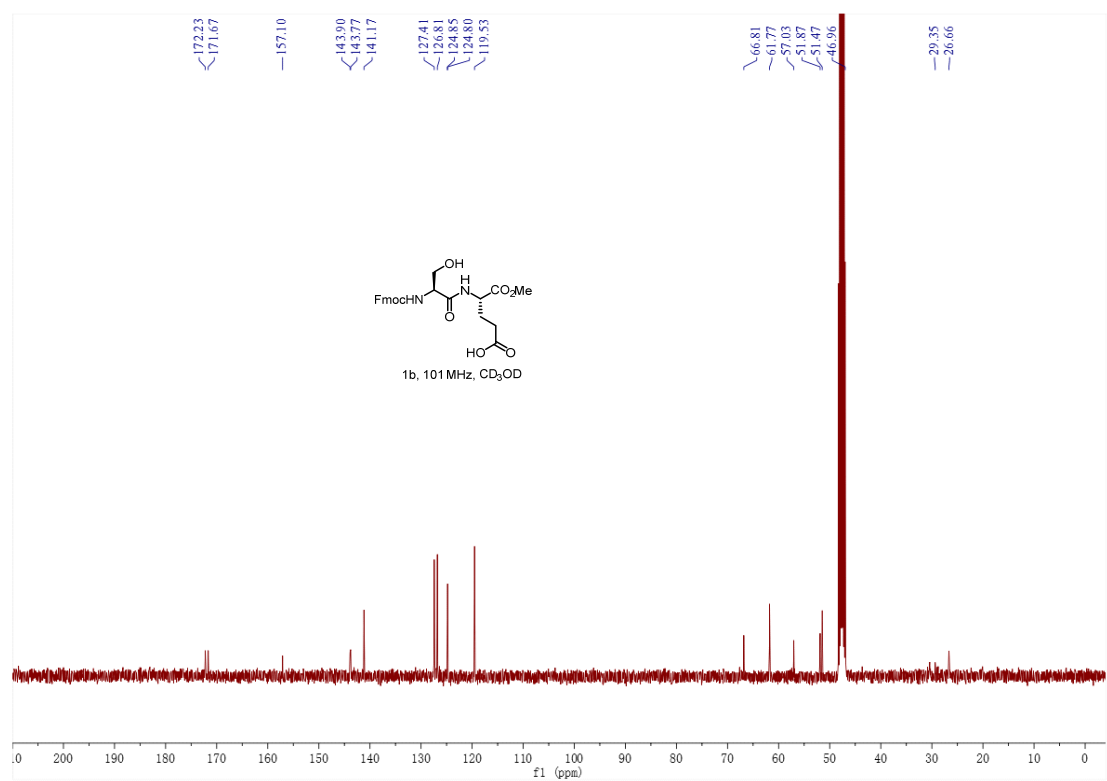

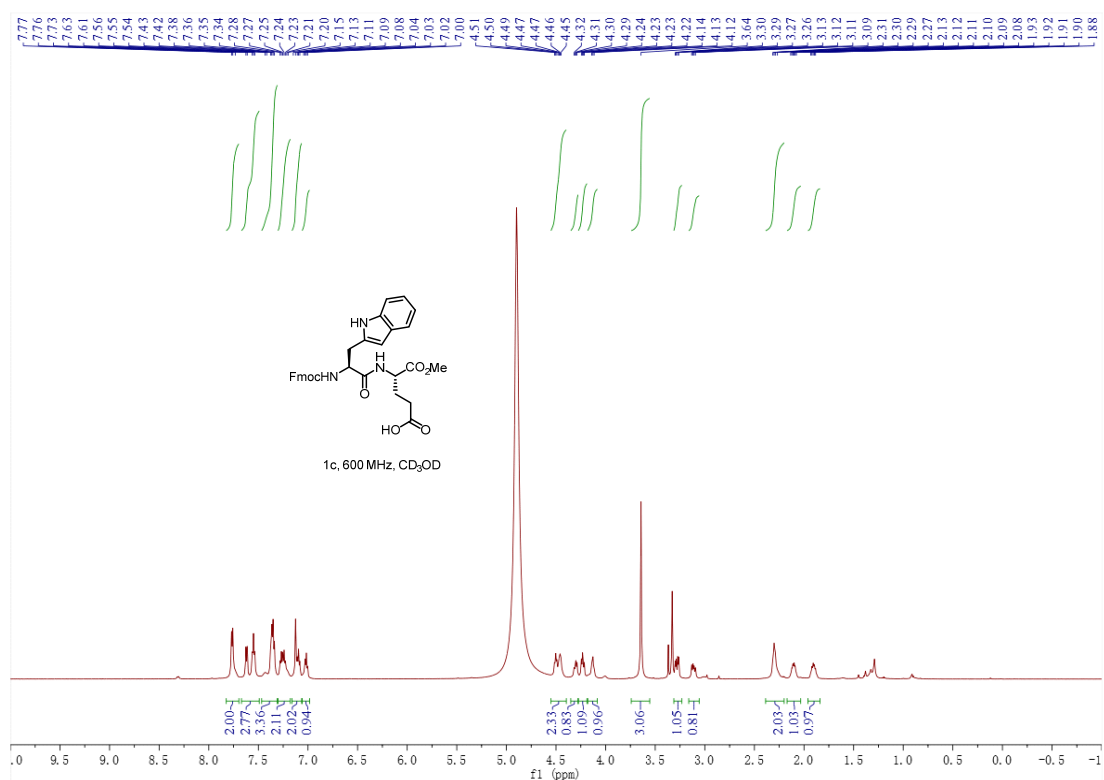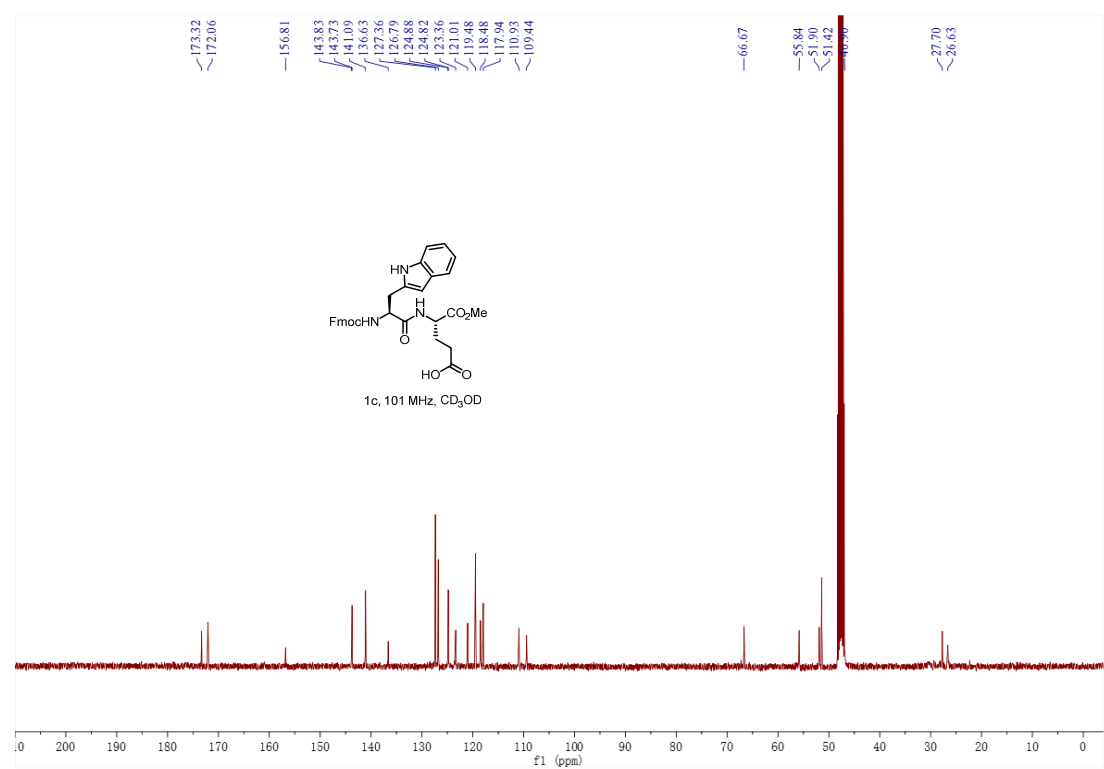

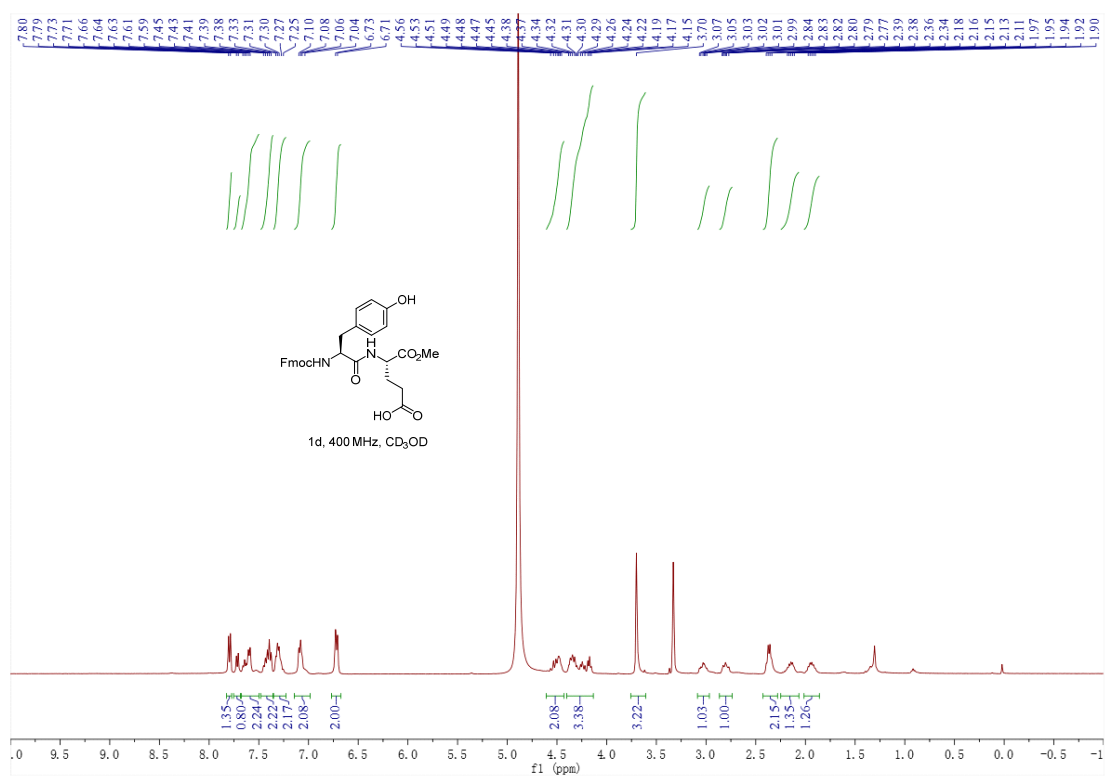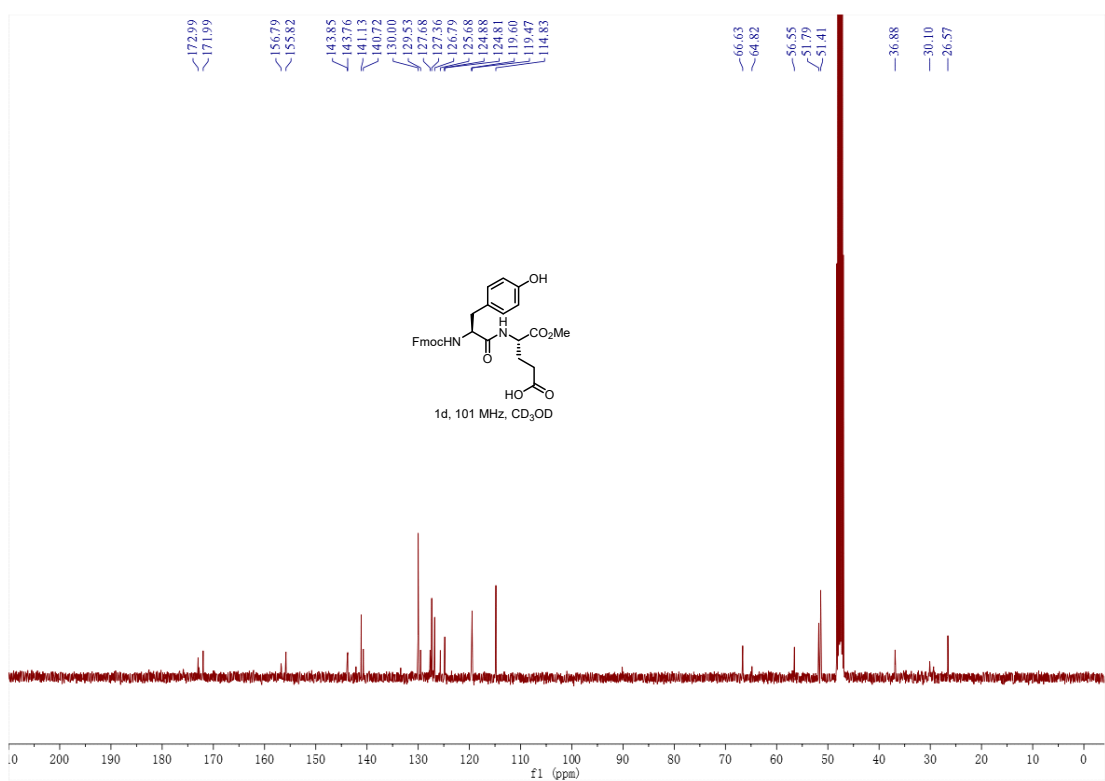

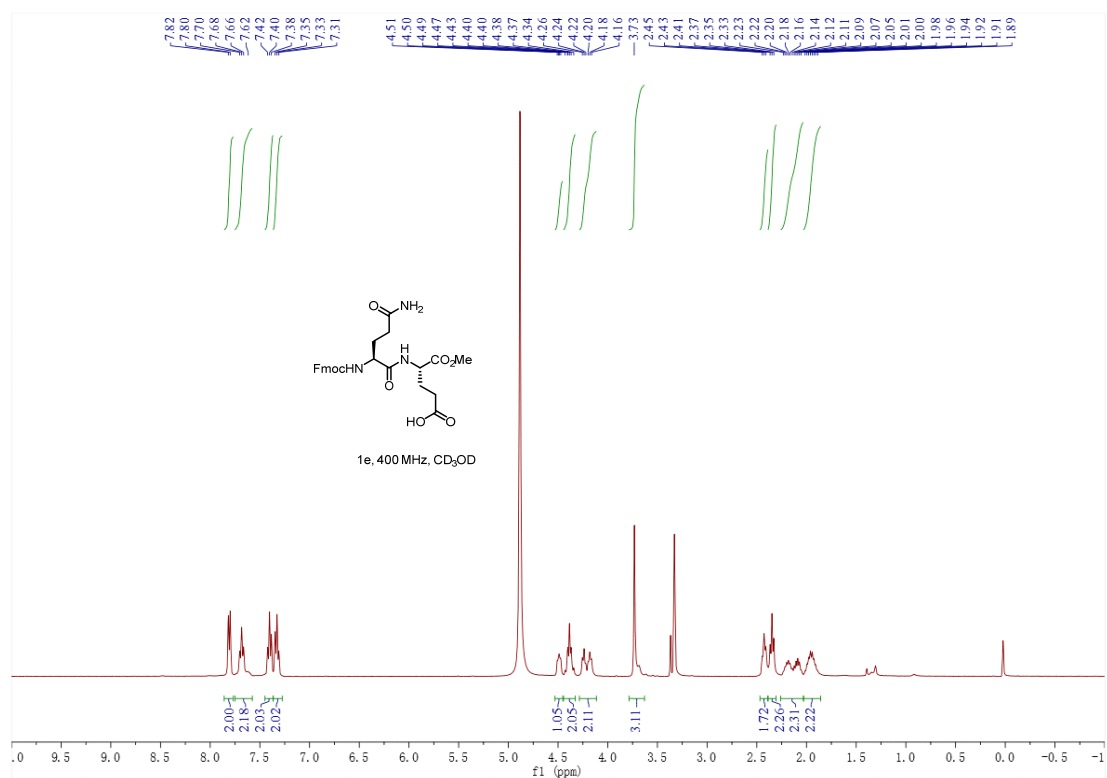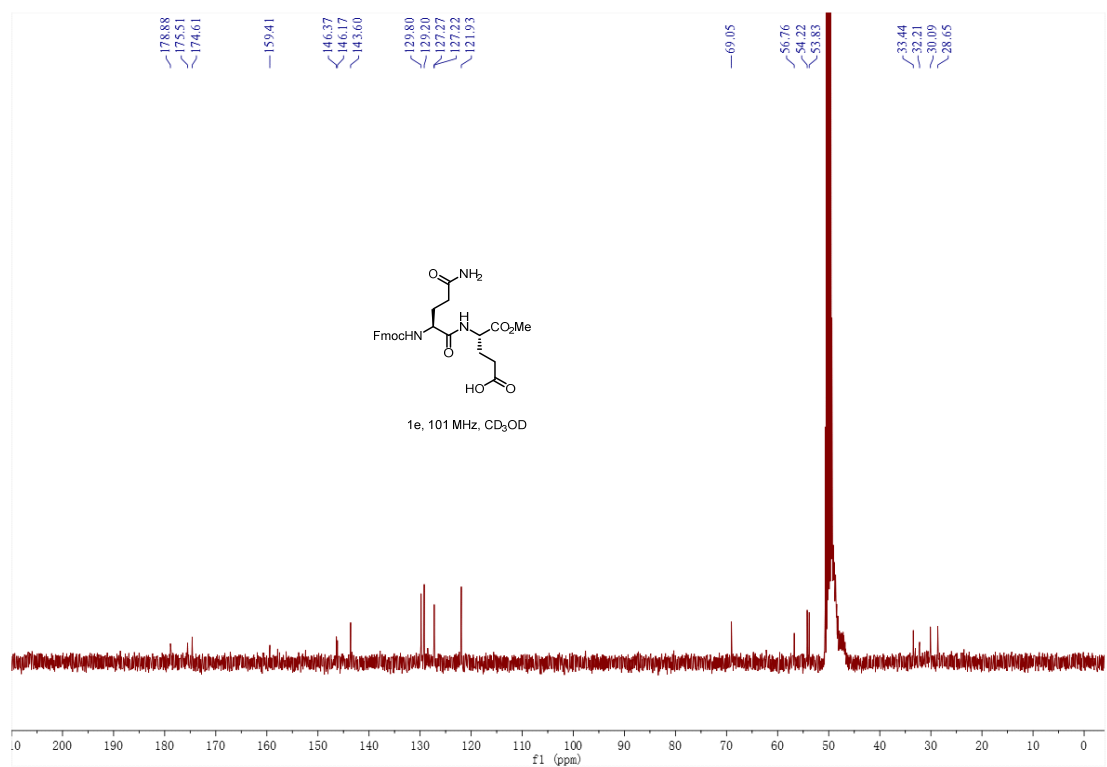

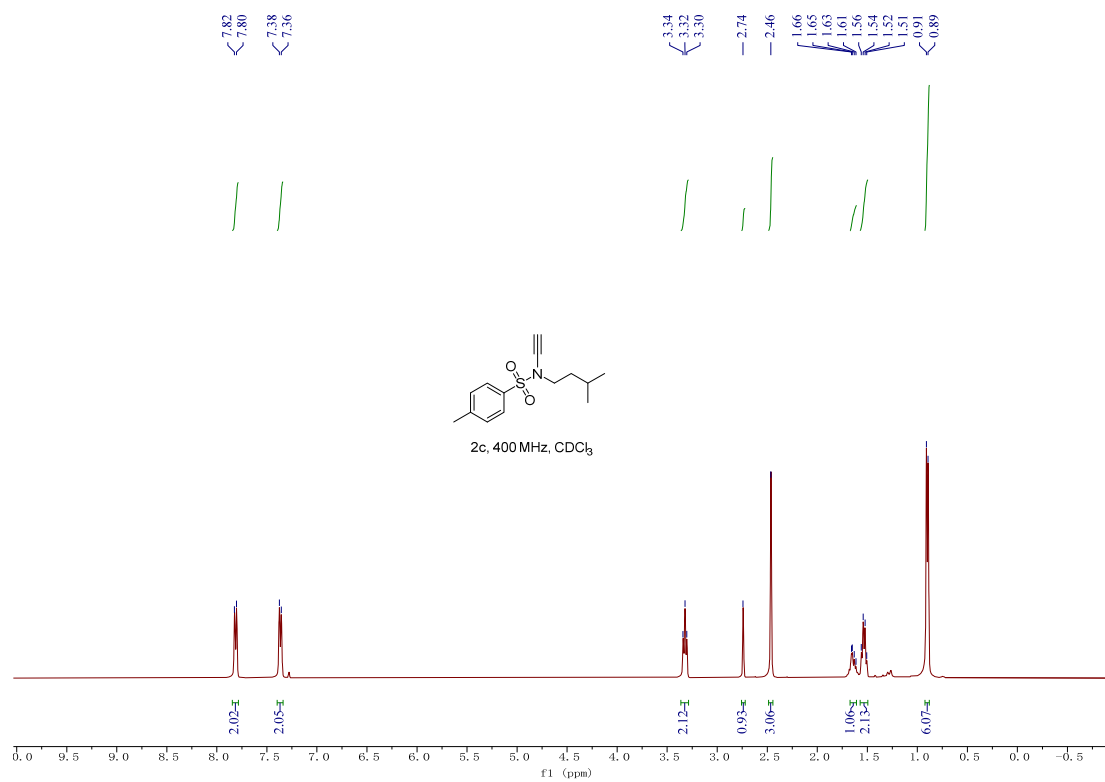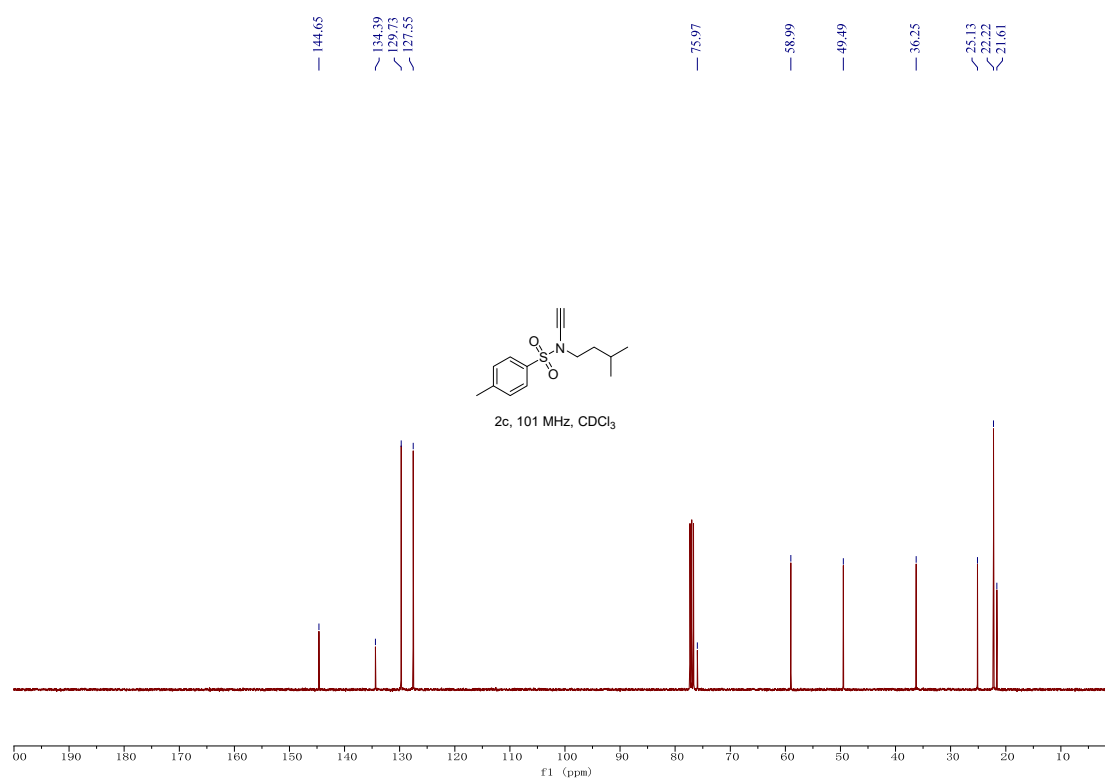

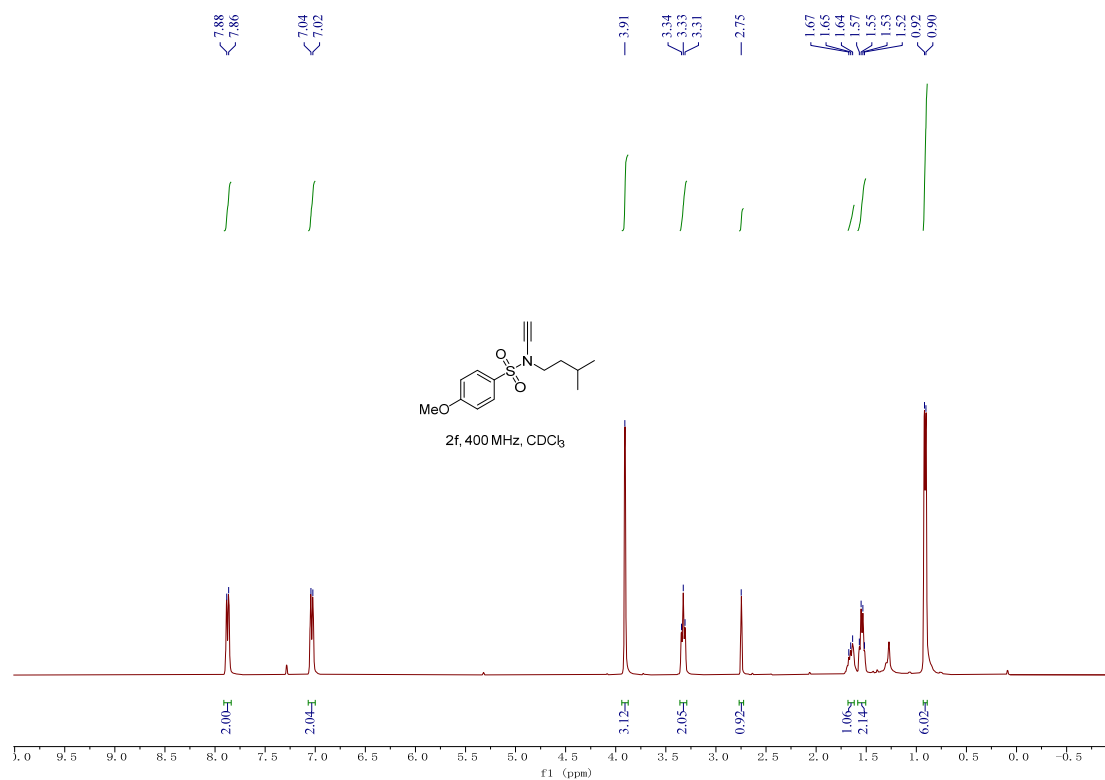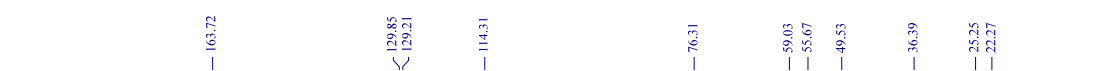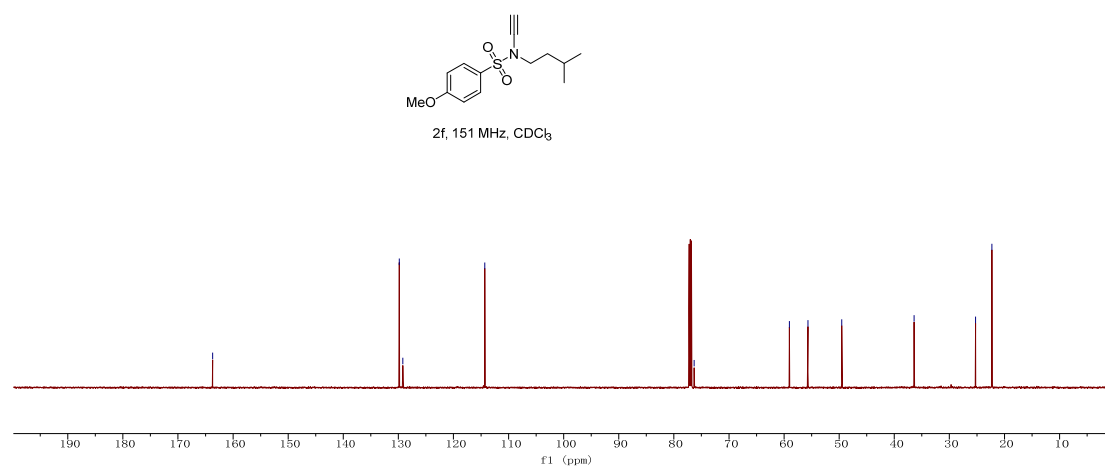

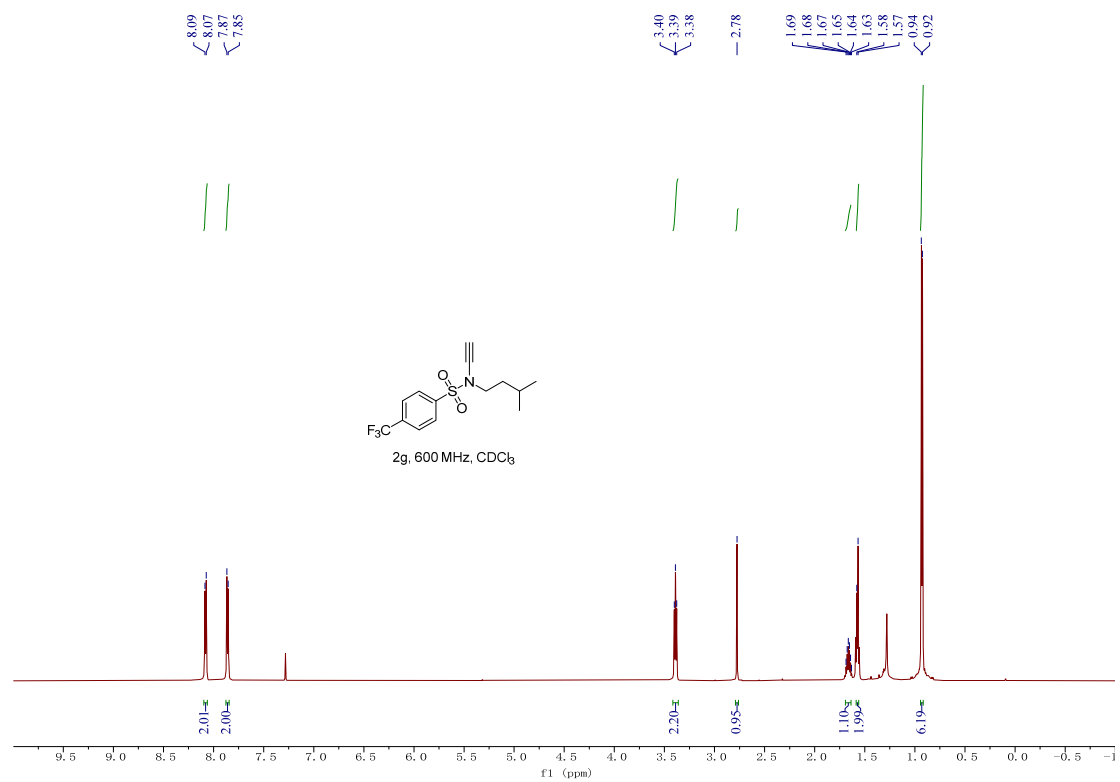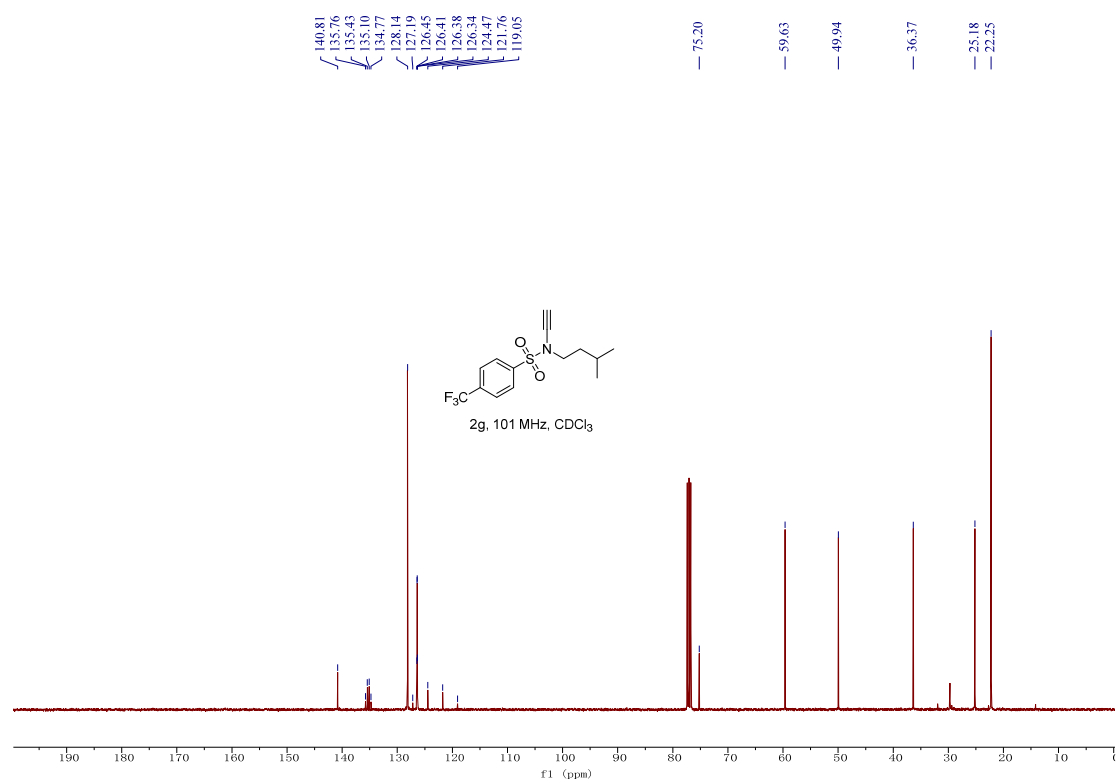

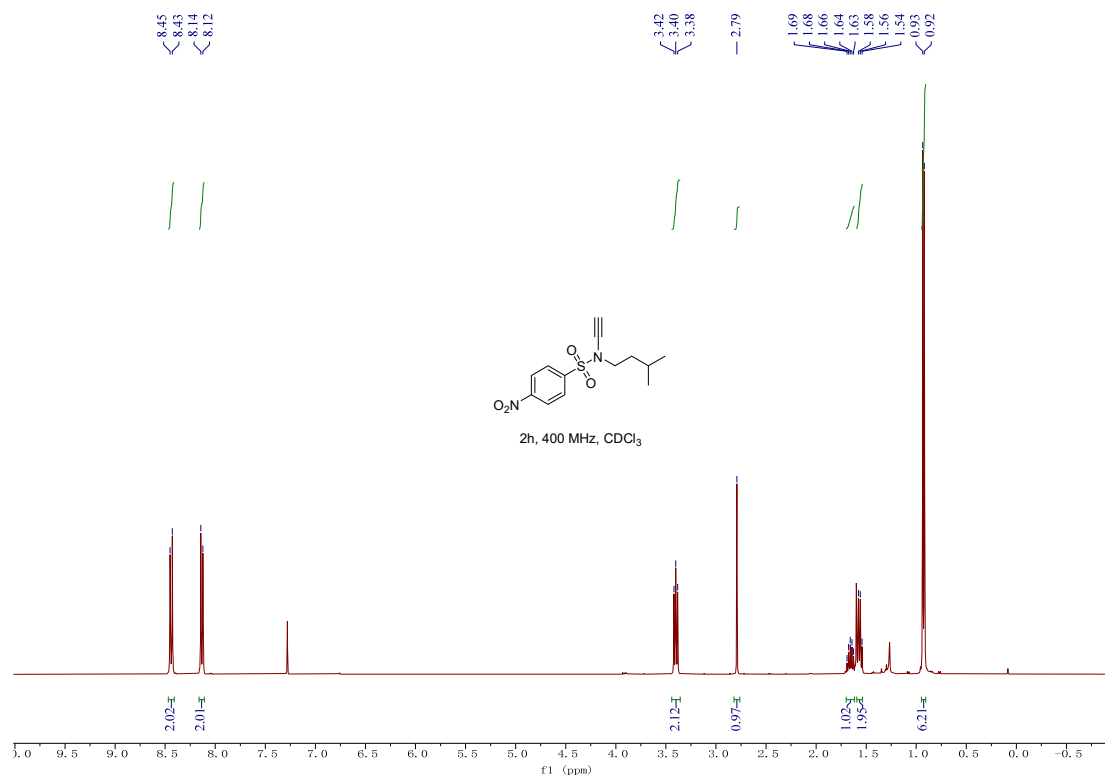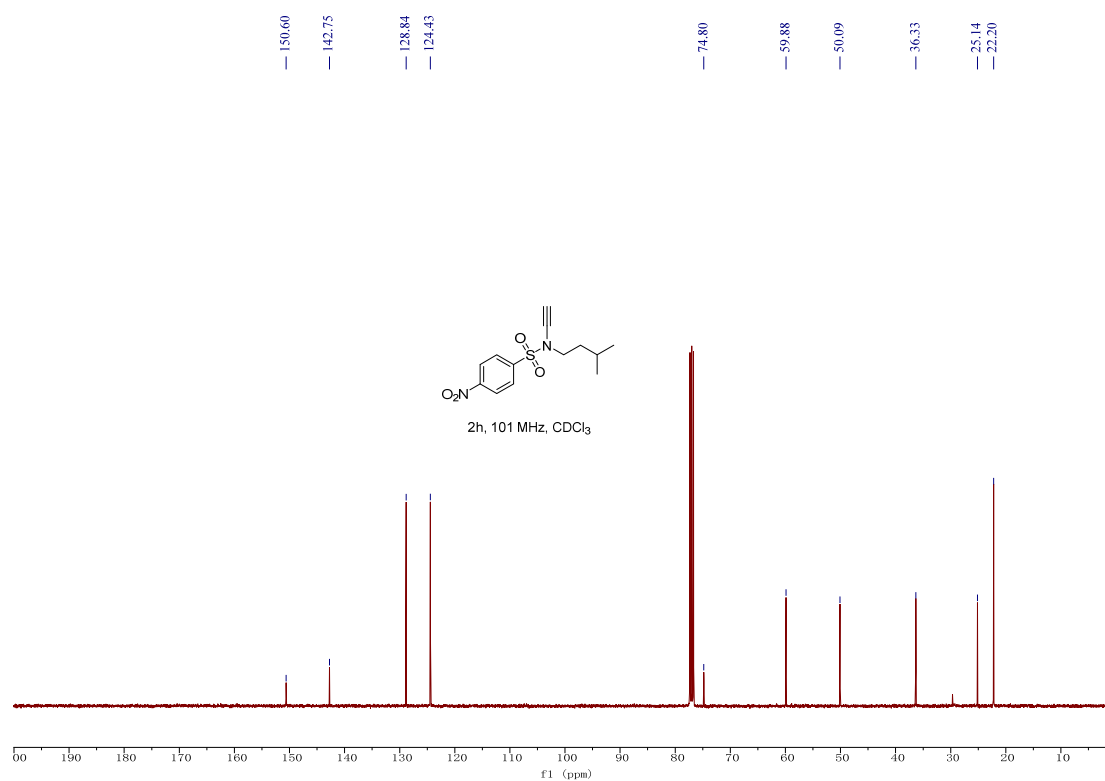

Supplement: s1 [file s1 › processes-2526178-supplementary.pdf]
