# Supplementary material for: Peptide Diversification through Addition Reaction of Free Carboxylic Acids to Ynamides
Source: MDPI journal article supplement (doi:10.3390/pr11082262), 2023-07-27
Supplement: s1 [file s1]

Archive with 1 entries (1 files):
- processes-2526178-supplementary.pdf
